# Supplementary material for: One-pot kinetic resolution–Mitsunobu reaction to access optically pure compounds, using silver salts in the substitution protocol
Source: Royal Society of Chemistry journal article supplement (doi:10.1039/d0nj04802j), 2020-01-01
Supplement: d0nj04802j1.pdf [file d0nj04802j1.pdf]

## Supporting information for

### One-pot kinetic resolution-Mitsunobu reaction to access optically pure compounds, silver salts in aid of substitution protocol

Hiten B. Raval and Ashutosh V. Bedekar\*

| <b>Contents:</b>                                                                                                                                                                                                                                                                                                                                                                                                                                                                                                                                                                                                                                                                                                                                                                                                                                                                                                           | <b>Page</b> |
|----------------------------------------------------------------------------------------------------------------------------------------------------------------------------------------------------------------------------------------------------------------------------------------------------------------------------------------------------------------------------------------------------------------------------------------------------------------------------------------------------------------------------------------------------------------------------------------------------------------------------------------------------------------------------------------------------------------------------------------------------------------------------------------------------------------------------------------------------------------------------------------------------------------------------|-------------|
| <b>For Table 1</b><br>(Screening of MOAc for one-pot KR-Mitsunobu)<br>HPLC Data of compound 1-(3-nitrophenyl)ethan-1-ol                                                                                                                                                                                                                                                                                                                                                                                                                                                                                                                                                                                                                                                                                                                                                                                                    | 2-6         |
| <b>For Table 2</b><br>(Use of catalytic amount of AgNO <sub>3</sub> to activate less reactive Co(OAc) <sub>2</sub> and NaOAc)<br>HPLC Data of compound 1-(3-nitrophenyl)ethan-1-ol                                                                                                                                                                                                                                                                                                                                                                                                                                                                                                                                                                                                                                                                                                                                         | 7-9         |
| <b>For Table 3</b><br>(Examples of comparison of KR and one-pot KR-Mitsunobu reaction as shown in )<br>NMR,HPLC Data of compound 1-(3-nitrophenyl)ethan-1-ol and 1-(3-nitrophenyl)ethyl acetate<br>NMR,HPLC Data of compound 1-(4-chlorophenyl)ethan-1-ol and 1-(4-chlorophenyl)ethyl acetate<br>NMR,HPLC Data of compound 1-(4-bromophenyl)ethan-1-ol and 1-(4-bromophenyl)ethyl acetate<br>NMR,HPLC Data of compound 1-(p-tolyl)ethan-1-ol and 1-(p-tolyl)ethyl acetate<br>NMR,HPLC Data of compound 1-(naphthalen-1-yl)ethan-1-ol and 1-(naphthalen-1-yl)ethyl acetate<br>NMR,HPLC Data of compound 1-(3,4-difluorophenyl)ethan-1-ol and 1-(3,4-difluorophenyl)ethyl acetate<br>NMR,HPLC Data of compound 1,2,3,4-tetrahydronaphthalen-1-ol and 1,2,3,4-tetrahydronaphthalen-1-yl acetate<br>NMR,HPLC Data of compound 1-(3,5-bis(trifluoromethyl)phenyl)ethan-1-ol and 1-(3,5-bis(trifluoromethyl)phenyl)ethyl acetate | 10-39       |
| <b>For Table 3</b> (Use of NaN <sub>3</sub> in the Mitsunobu step)<br>NMR,IR,HPLC Data of compound 1-(1-azidoethyl)-3-nitrobenzene and 1-(3-nitrophenyl)ethyl acetate                                                                                                                                                                                                                                                                                                                                                                                                                                                                                                                                                                                                                                                                                                                                                      | 40-47       |

HPLC (*R*) 1-(3-nitrophenyl)ethan-1-ol for CH<sub>3</sub>COOAg

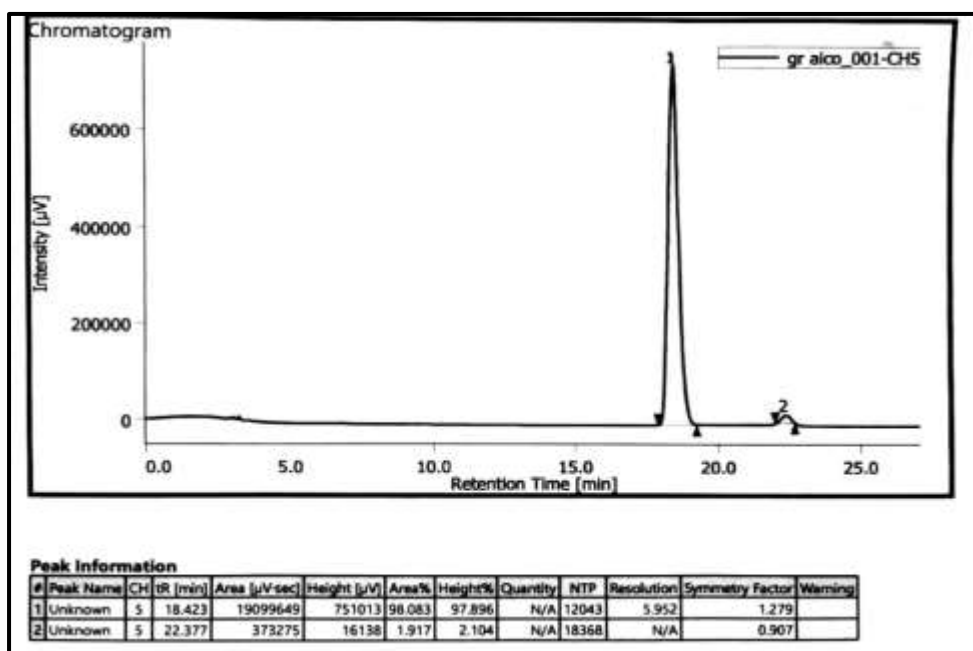

HPLC Condition for compound 1-(3-nitrophenyl)ethan-1-ol<sup>b</sup> Determined by HPLC analysis (chiral column Amylose, 1ml/min IPA (5.0%) in hexane; 18.42 min for (*R*)-1 and 22.37 min for (*S*)-1)

HPLC (*R*) 1-(3-nitrophenyl)ethan-1-ol for Hg(OAc)<sub>2</sub>

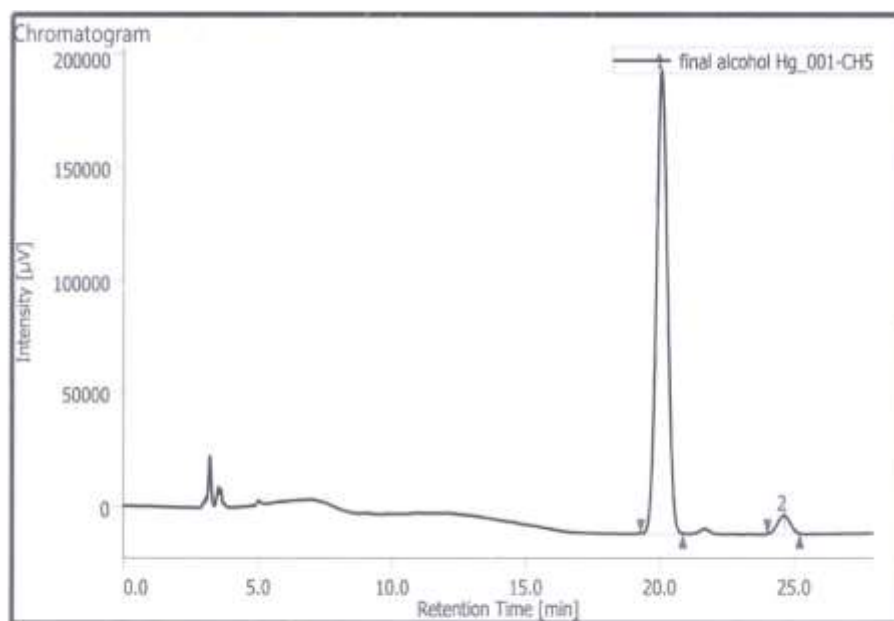

| Peak Information |           |    |          |               |             |        |         |          |       |            |                 |         |
|------------------|-----------|----|----------|---------------|-------------|--------|---------|----------|-------|------------|-----------------|---------|
| #                | Peak Name | CH | TR [min] | Area [µV-sec] | Height [µV] | Area%  | Height% | Quantity | NTP   | Resolution | Symmetry Factor | Warning |
| 1                | Unknown   | 5  | 20.043   | 5844907       | 204532      | 95.683 | 96.203  | N/A      | 11178 | 5.562      | 1.070           |         |
| 2                | Unknown   | 5  | 24.613   | 263703        | 8072        | 4.317  | 3.797   | N/A      | 12255 | N/A        | 0.962           |         |

HPLC (R) 1-(3-nitrophenyl)ethan-1-ol for Pb(OAc)<sub>2</sub>

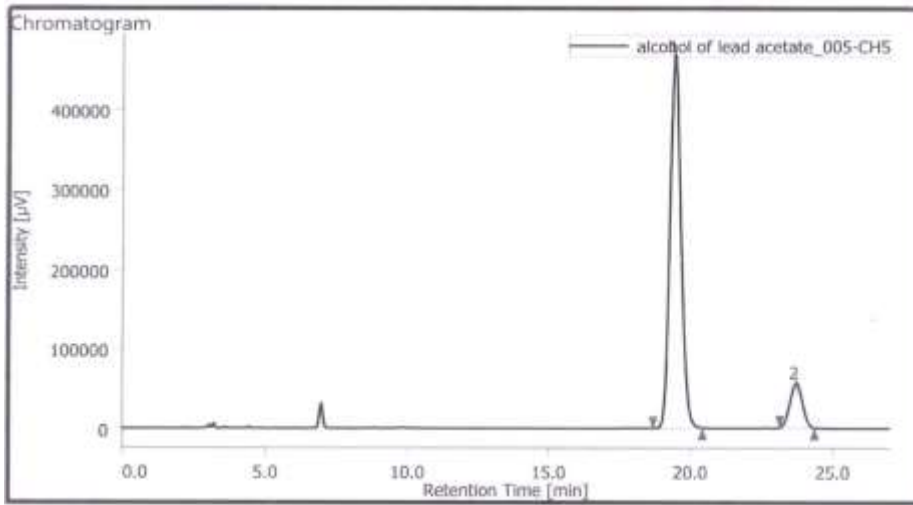

Peak Information

| # | Peak Name | CH | RT [min] | Area [µV·sec] | Height [µV] | Area%  | Height% | Quantity | NTP   | Resolution | Symmetry Factor | Warning |
|---|-----------|----|----------|---------------|-------------|--------|---------|----------|-------|------------|-----------------|---------|
| 1 | Unknown   | 5  | 19.413   | 12624275      | 469662      | 88.066 | 89.353  | N/A      | 12144 | 5.612      | 1.196           |         |
| 2 | Unknown   | 5  | 23.667   | 1710704       | 33990       | 11.934 | 10.647  | N/A      | 13278 | N/A        | 1.020           |         |

HPLC (R) 1-(3-nitrophenyl)ethan-1-ol for Cu(OAc)<sub>2</sub>

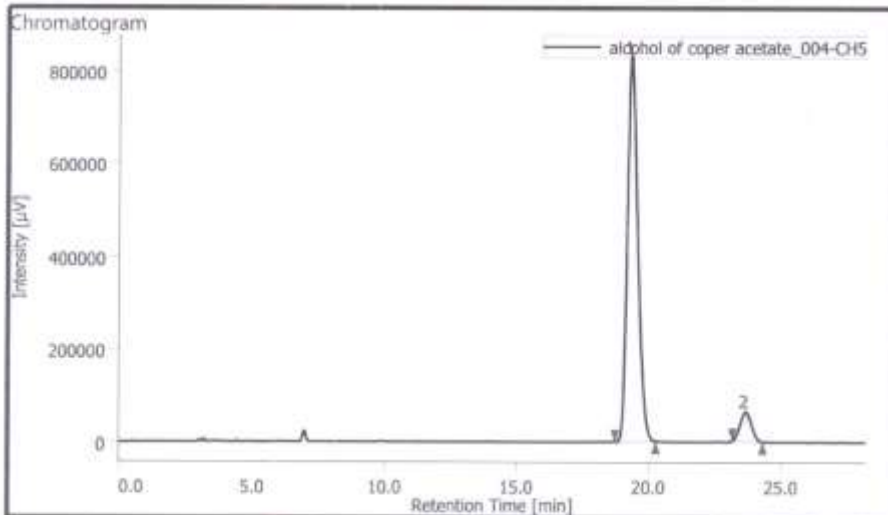

Peak Information

| # | Peak Name | CH | RT [min] | Area [µV·sec] | Height [µV] | Area%  | Height% | Quantity | NTP   | Resolution | Symmetry Factor | Warning |
|---|-----------|----|----------|---------------|-------------|--------|---------|----------|-------|------------|-----------------|---------|
| 1 | Unknown   | 5  | 19.323   | 22798679      | 833114      | 92.441 | 92.978  | N/A      | 11593 | 5.700      | 1.331           |         |
| 2 | Unknown   | 5  | 23.647   | 1864222       | 62920       | 7.559  | 7.022   | N/A      | 13867 | N/A        | 1.054           |         |

HPLC (R) 1-(3-nitrophenyl)ethan-1-ol for Mn(OAc)<sub>2</sub>

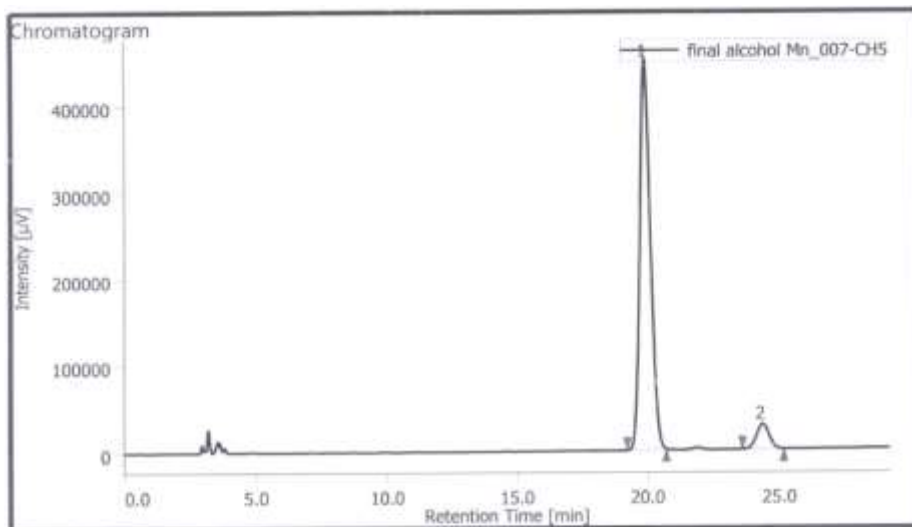

Peak Information

| # | Peak Name | CH | TR [min] | Area [µV·sec] | Height [µV] | Area%  | Height% | Quantity | NTP   | Resolution | Symmetry Factor | Warning |
|---|-----------|----|----------|---------------|-------------|--------|---------|----------|-------|------------|-----------------|---------|
| 1 | Unknown   | S  | 19.870   | 12642180      | 451131      | 93.109 | 94.148  | N/A      | 11618 | 5.543      | 1.238           |         |
| 2 | Unknown   | S  | 24.353   | 935691        | 28039       | 6.891  | 5.852   | N/A      | 12124 | N/A        | 1.014           |         |

HPLC (R) 1-(3-nitrophenyl)ethan-1-ol for Mg(OAc)<sub>2</sub>

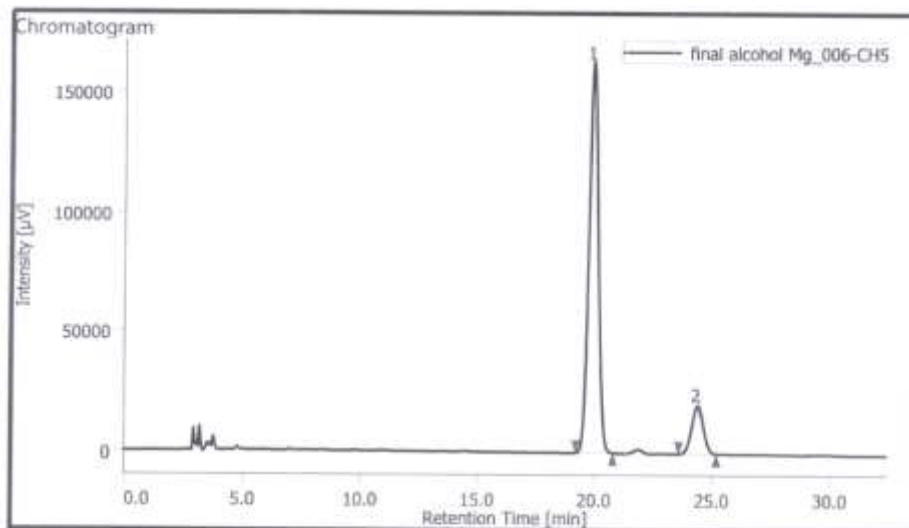

Peak Information

| # | Peak Name | CH | TR [min] | Area [µV·sec] | Height [µV] | Area%  | Height% | Quantity | NTP   | Resolution | Symmetry Factor | Warning |
|---|-----------|----|----------|---------------|-------------|--------|---------|----------|-------|------------|-----------------|---------|
| 1 | Unknown   | S  | 19.903   | 4529994       | 163717      | 86.951 | 89.163  | N/A      | 11864 | 5.470      | 1.066           |         |
| 2 | Unknown   | S  | 24.373   | 679652        | 19899       | 13.049 | 10.837  | N/A      | 11536 | N/A        | 1.004           |         |

HPLC (R) 1-(3-nitrophenyl)ethan-1-ol for Co(OAc)<sub>2</sub>

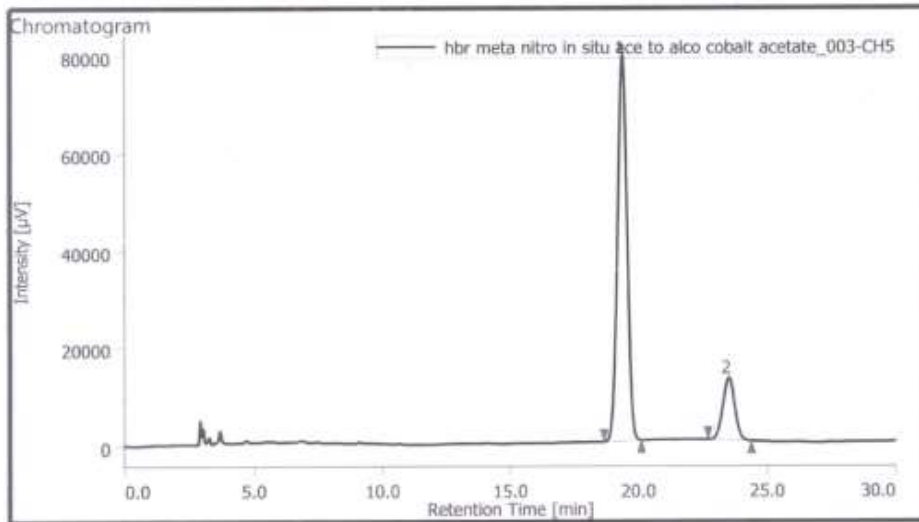

Peak Information

| # | Peak Name | CH | tR [min] | Area [μV-sec] | Height [μV] | Area%  | Height% | Quantity | NTP   | Resolution | Symmetry Factor | Warning |
|---|-----------|----|----------|---------------|-------------|--------|---------|----------|-------|------------|-----------------|---------|
| 1 | Unknown   | S  | 19.373   | 2043977       | 79136       | 83.453 | 86.215  | N/A      | 12821 | 5.399      | 0.993           |         |
| 2 | Unknown   | S  | 23.497   | 405275        | 12653       | 16.547 | 13.785  | N/A      | 12306 | N/A        | 1.000           |         |

HPLC (R) 1-(3-nitrophenyl)ethan-1-ol for Ni(OAc)<sub>2</sub>

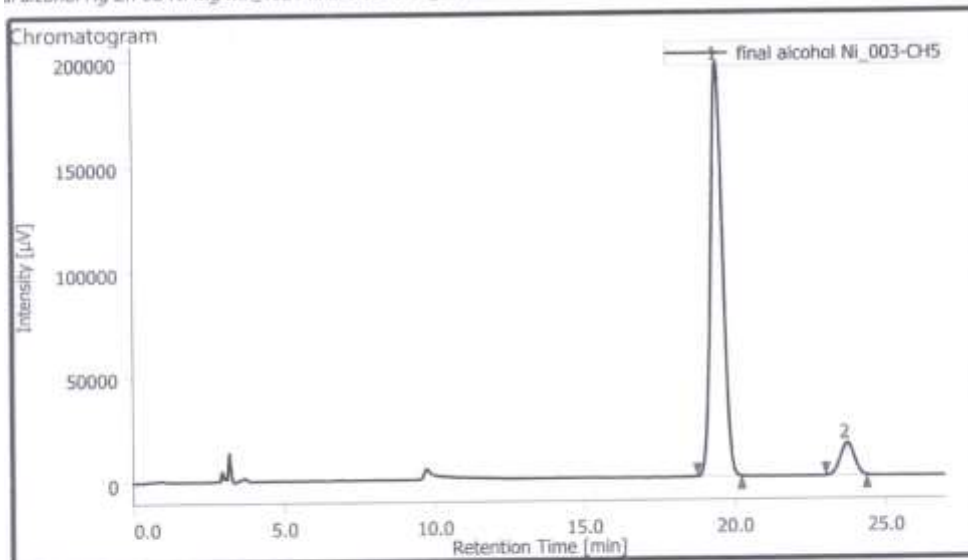

Peak Information

| # | Peak Name | CH | tR [min] | Area [μV-sec] | Height [μV] | Area%  | Height% | Quantity | NTP   | Resolution | Symmetry Factor | Warning |
|---|-----------|----|----------|---------------|-------------|--------|---------|----------|-------|------------|-----------------|---------|
| 1 | Unknown   | S  | 19.420   | 5380817       | 196443      | 91.651 | 92.914  | N/A      | 11456 | 5.355      | 1.055           |         |
| 2 | Unknown   | S  | 23.697   | 490175        | 14983       | 8.349  | 7.086   | N/A      | 11717 | N/A        | 0.984           |         |

HPLC (R) 1-(3-nitrophenyl)ethan-1-ol for CH<sub>3</sub>COONa

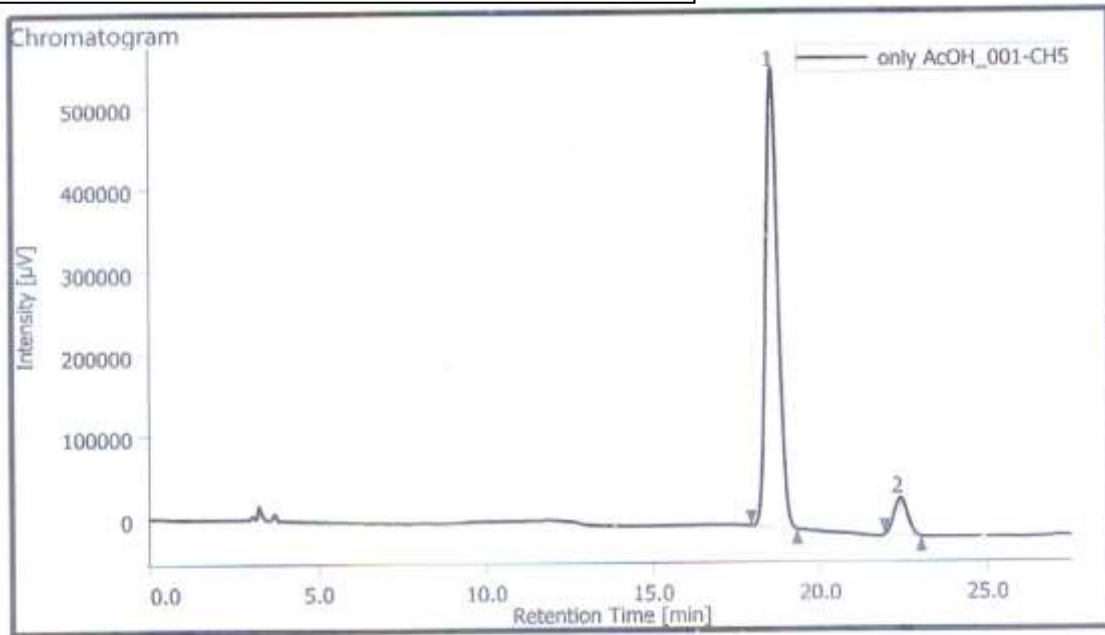

Peak Information

| # | Peak Name | CH | tR [min] | Area [µV-sec] | Height [µV] | Area%  | Height% | Quantity | NTP   | Resolution | Symmetry Factor | Warning |
|---|-----------|----|----------|---------------|-------------|--------|---------|----------|-------|------------|-----------------|---------|
| 1 | Unknown   | 5  | 18.553   | 14009885      | 557357      | 91.836 | 92.676  | N/A      | 12485 | 5.373      | 1.178           |         |
| 2 | Unknown   | 5  | 22.387   | 1245444       | 44044       | 8.164  | 7.324   | N/A      | 13650 | N/A        | 1.078           |         |

HPLC (R) 1-(3-nitrophenyl)ethan-1-ol(Co(OAc)2/AgNO3:2.0/0.0)

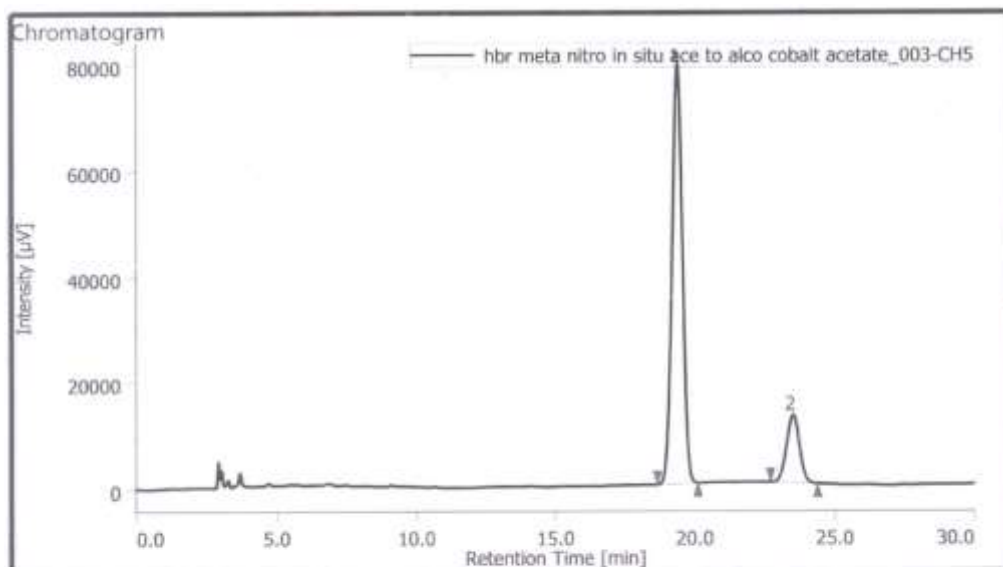

Peak Information

| # | Peak Name | CH | tR [min] | Area [µV-sec] | Height [µV] | Area%  | Height% | Quantity | NTP   | Resolution | Symmetry Factor | Warning |
|---|-----------|----|----------|---------------|-------------|--------|---------|----------|-------|------------|-----------------|---------|
| 1 | Unknown   | S  | 18.373   | 2043977       | 79136       | 83.453 | 86.215  | N/A      | 12821 | 5.399      | 0.993           |         |
| 2 | Unknown   | S  | 23.497   | 405275        | 12653       | 16.547 | 13.785  | N/A      | 12306 | N/A        | 1.000           |         |

HPLC Condition for compound 1-(3-nitrophenyl)ethan-1-ol<sup>b</sup> Determined by HPLC analysis (chiral column Amylose, 1ml/min IPA (5.0%) in hexane; 18.42 min for (R)-1 and 22.37 min for (S)-1)

HPLC (R) 1-(3-nitrophenyl)ethan-1-ol(Co(OAc)2/AgNO3:1.75/0.25)

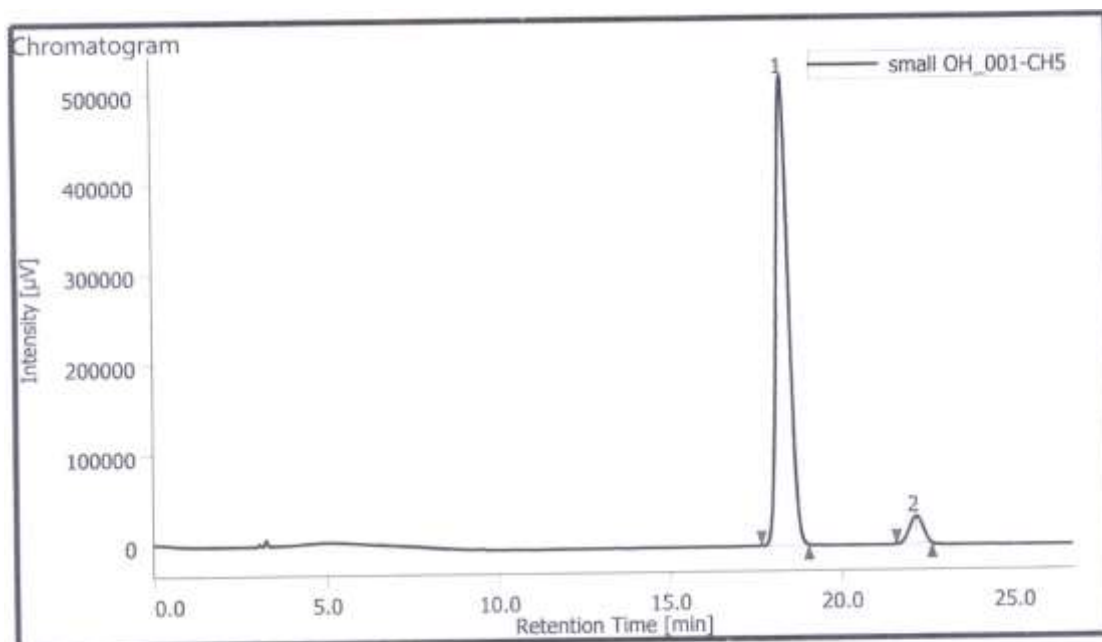

Peak Information

| # | Peak Name | CH | tR [min] | Area [µV-sec] | Height [µV] | Area%  | Height% | Quantity | NTP   | Resolution | Symmetry Factor | Warning |
|---|-----------|----|----------|---------------|-------------|--------|---------|----------|-------|------------|-----------------|---------|
| 1 | Unknown   | S  | 18.297   | 12968278      | 522047      | 93.944 | 94.551  | N/A      | 12403 | 5.453      | 1.164           |         |
| 2 | Unknown   | S  | 22.140   | 835998        | 30086       | 6.056  | 5.449   | N/A      | 13713 | N/A        | 0.936           |         |

HPLC (R) 1-(3-nitrophenyl)ethan-1-ol(Co(OAc)2/AgNO3:1.50/0.50)

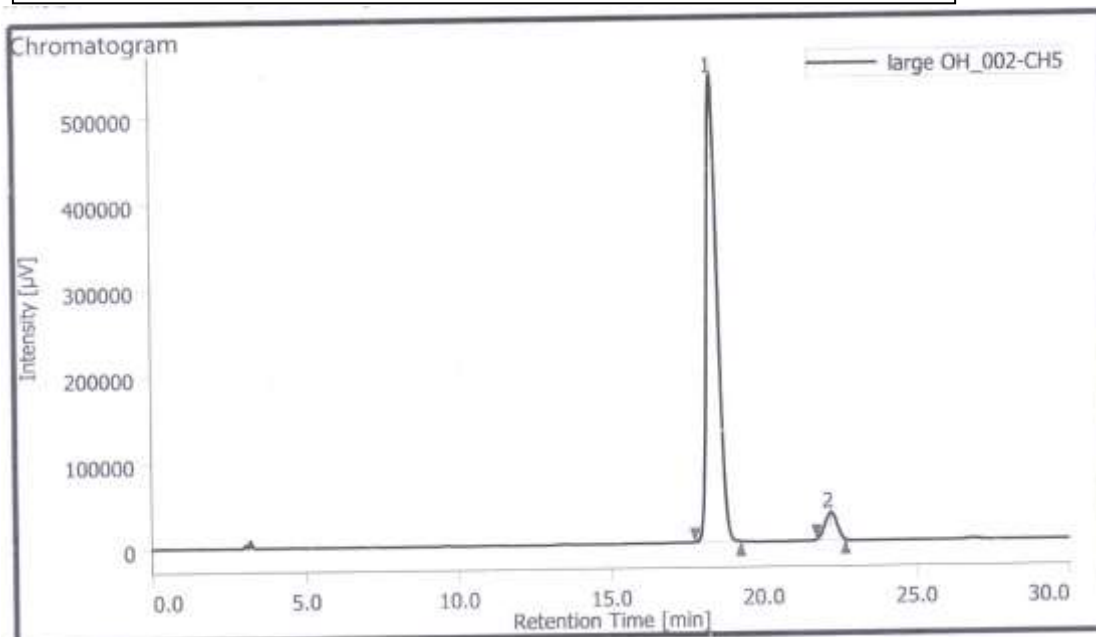

**Peak Information**

| # | Peak Name | CH | tR [min] | Area [µV-sec] | Height [µV] | Area%  | Height% | Quantity | NTP   | Resolution | Symmetry Factor | Warning |
|---|-----------|----|----------|---------------|-------------|--------|---------|----------|-------|------------|-----------------|---------|
| 1 | Unknown   | 5  | 18.370   | 13382699      | 540080      | 94.067 | 94.488  | N/A      | 12606 | 5.534      | 1.157           |         |
| 2 | Unknown   | 5  | 22.203   | 844056        | 31504       | 5.933  | 5.512   | N/A      | 14619 | N/A        | 0.984           |         |



HPLC (R) 1-(3-nitrophenyl)ethan-1-ol(CH<sub>3</sub>COONa/AgNO<sub>3</sub>:2.0/0.0)

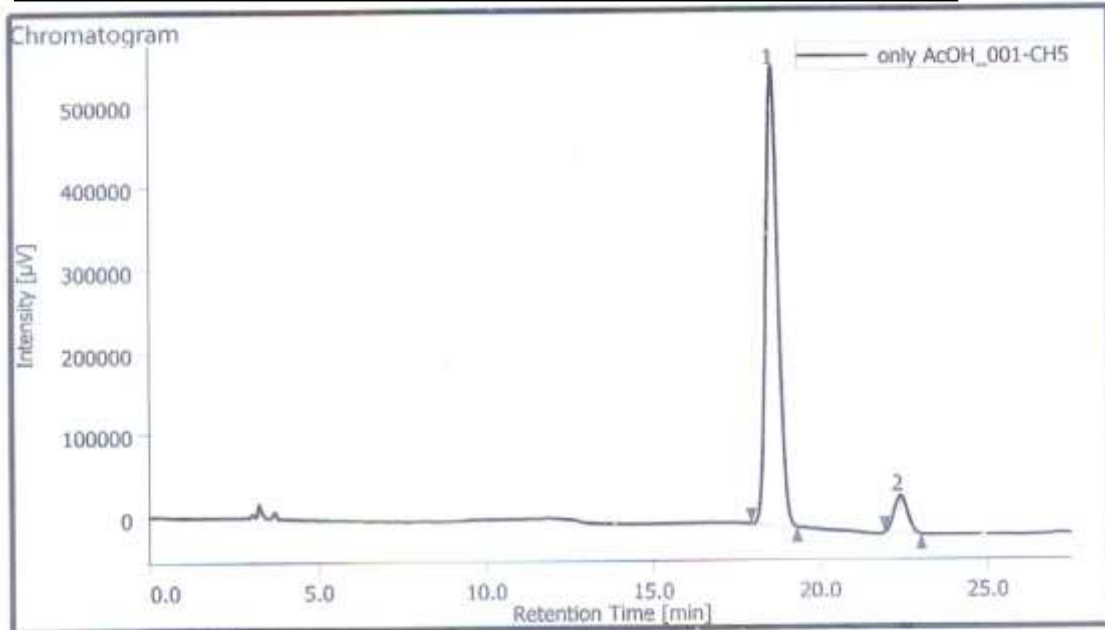

**Peak Information**

| # | Peak Name | CH | tR [min] | Area [µV-sec] | Height [µV] | Area%  | Height% | Quantity | NTP   | Resolution | Symmetry Factor | Warning |
|---|-----------|----|----------|---------------|-------------|--------|---------|----------|-------|------------|-----------------|---------|
| 1 | Unknown   | 5  | 18.553   | 14009885      | 557357      | 91.836 | 92.676  | N/A      | 12485 | 5.373      | 1.178           |         |
| 2 | Unknown   | 5  | 22.387   | 1245444       | 44044       | 8.164  | 7.324   | N/A      | 13650 | N/A        | 1.078           |         |

HPLC (R) 1-(3-nitrophenyl)ethan-1-ol(CH<sub>3</sub>COONa/AgNO<sub>3</sub>:1.75/0.25)

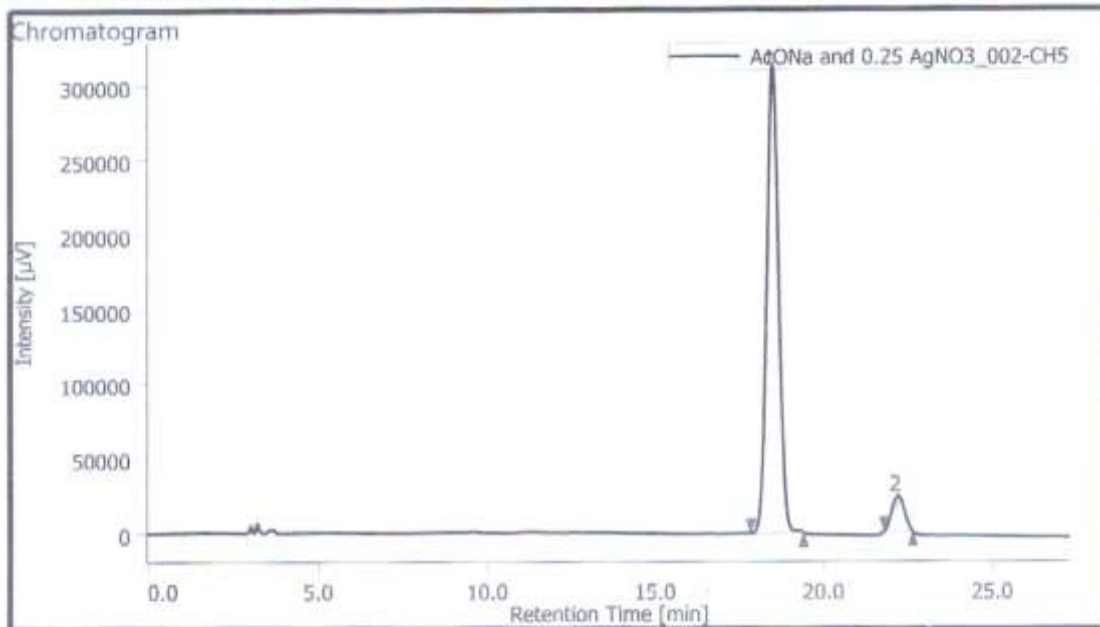

**Peak Information**

| # | Peak Name | CH | tR [min] | Area [µV-sec] | Height [µV] | Area%  | Height% | Quantity | NTP   | Resolution | Symmetry Factor | Warning |
|---|-----------|----|----------|---------------|-------------|--------|---------|----------|-------|------------|-----------------|---------|
| 1 | Unknown   | 5  | 18.473   | 7615426       | 312724      | 92.575 | 92.986  | N/A      | 13234 | 5.479      | 1.079           |         |
| 2 | Unknown   | 5  | 22.197   | 610796        | 23587       | 7.425  | 7.014   | N/A      | 15189 | N/A        | 1.016           |         |

HPLC (R) 1-(3-nitrophenyl)ethan-1-ol(CH3COONa/AgNO3:1.50/0.50)

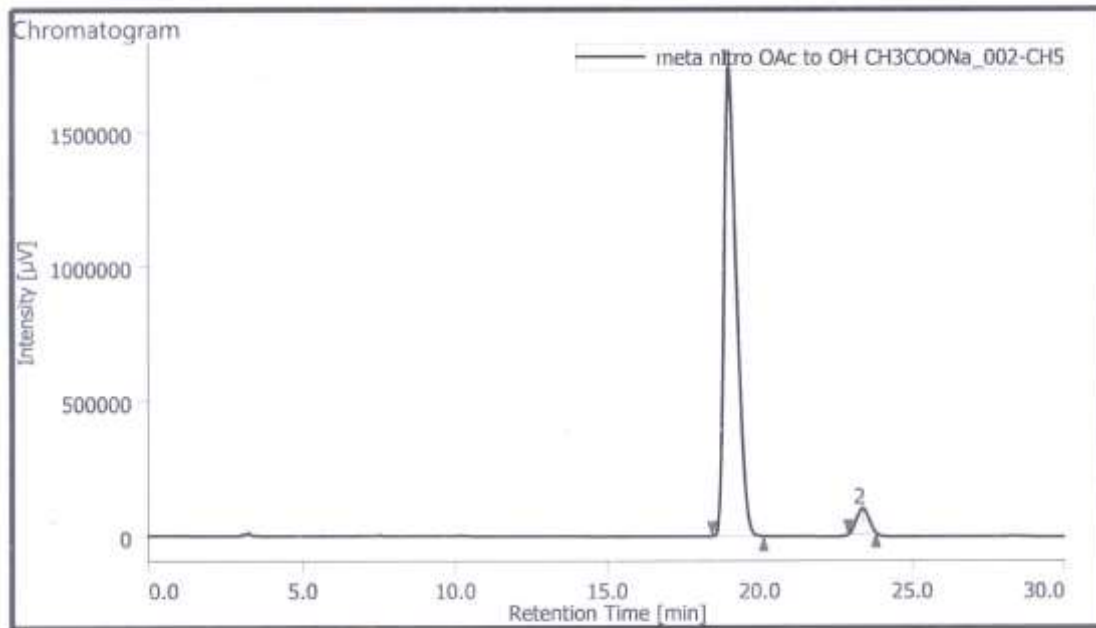

Peak Information

| # | Peak Name | CH | tR [min] | Area [µV-sec] | Height [µV] | Area%  | Height% | Quantity | NTP   | Resolution | Symmetry Factor | Warning |
|---|-----------|----|----------|---------------|-------------|--------|---------|----------|-------|------------|-----------------|---------|
| 1 | Unknown   | 5  | 18.973   | 49362935      | 1739983     | 95.074 | 94.987  | N/A      | 10273 | 5.764      | 1.529           |         |
| 2 | Unknown   | 5  | 23.357   | 2557572       | 91823       | 4.926  | 5.013   | N/A      | 14490 | N/A        | 0.977           |         |

NMR 1-(3-nitrophenyl)ethan-1-ol

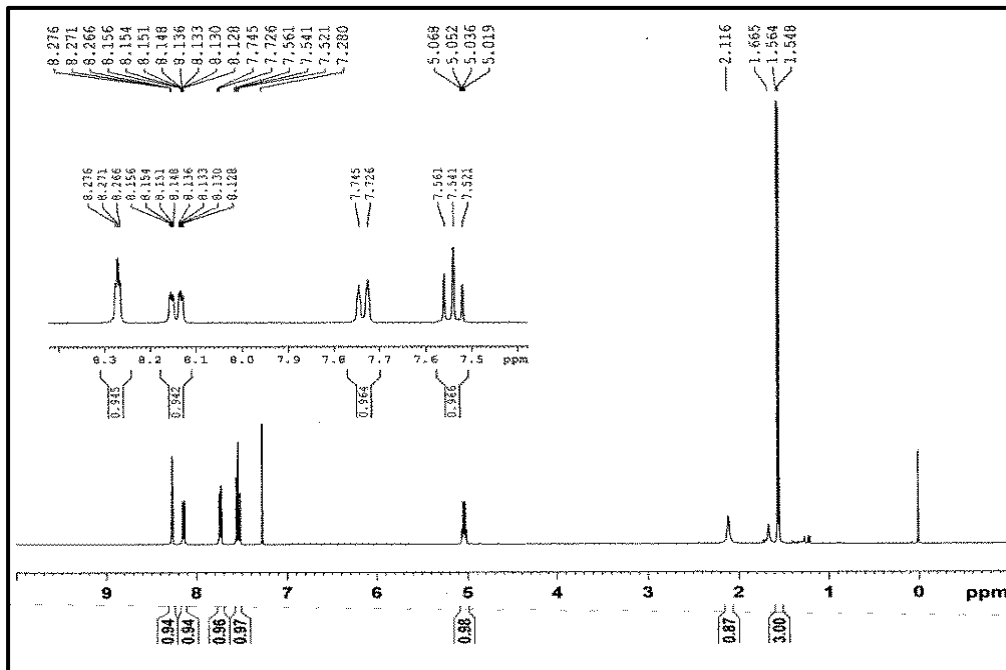

NMR 1-(3-nitrophenyl)ethyl acetate

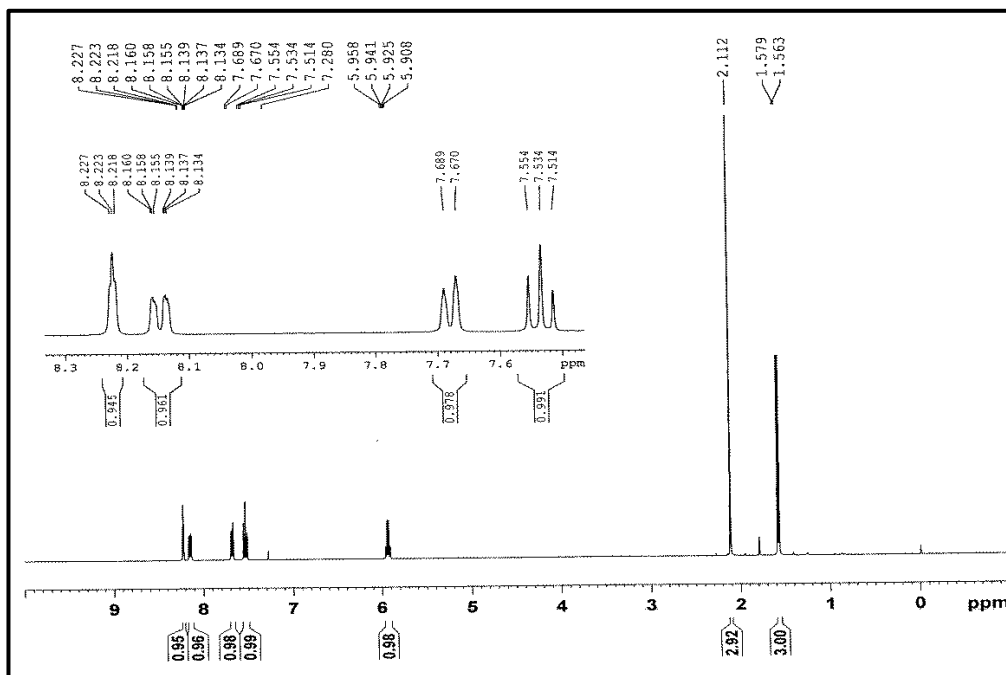

Racemic 1-(3-nitrophenyl)ethan-1-ol

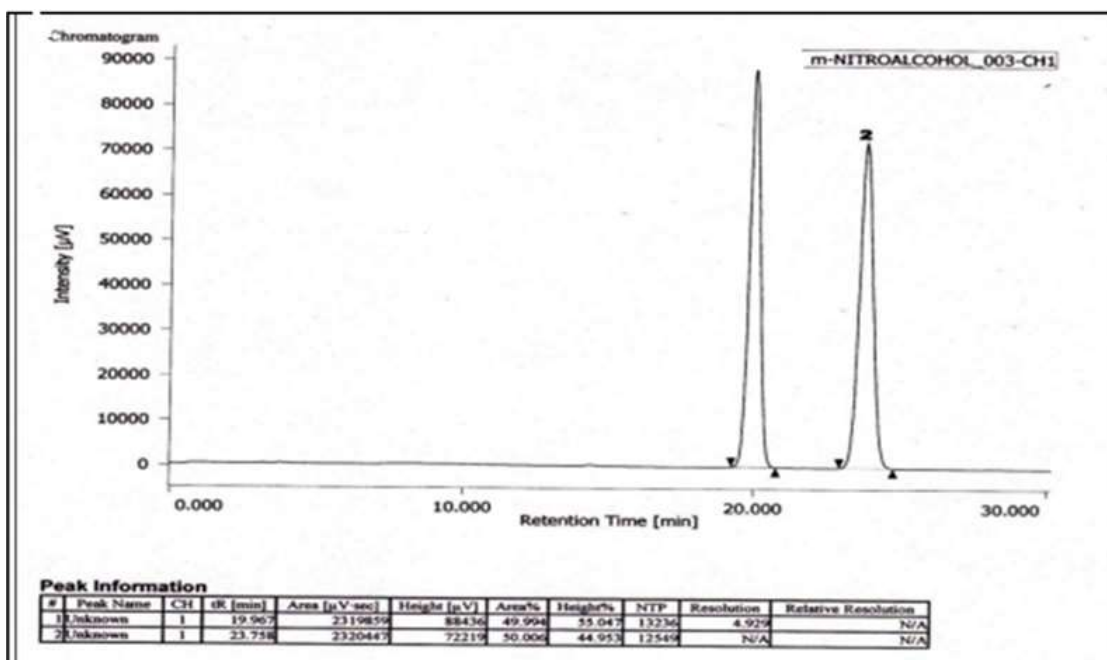

HPLC Condition for compound 1-(3-nitrophenyl)ethan-1-ol<sup>b</sup> Determined by HPLC analysis (chiral column Amylose, 1ml/min IPA (5.0%) in hexane; 18.42 min for (R)-1 and 22.37 min for (S)-1)

(S) 1-(3-nitrophenyl)ethan-1-ol

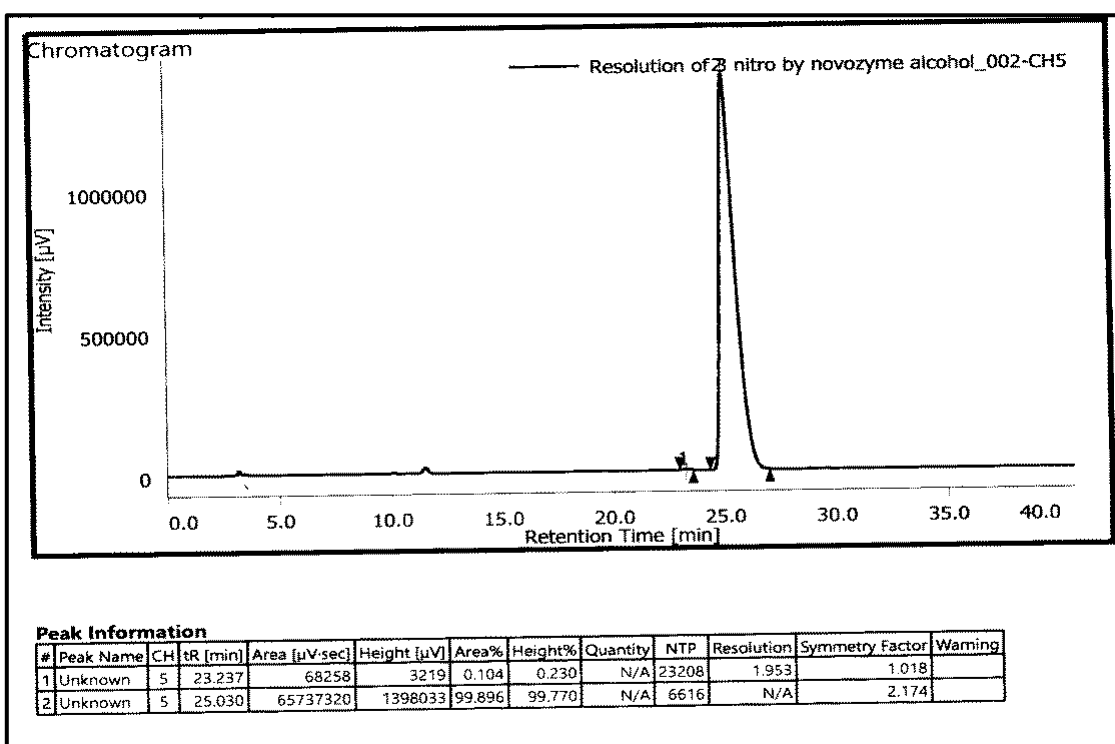

Racemic 1-(3-nitrophenyl)ethyl acetate

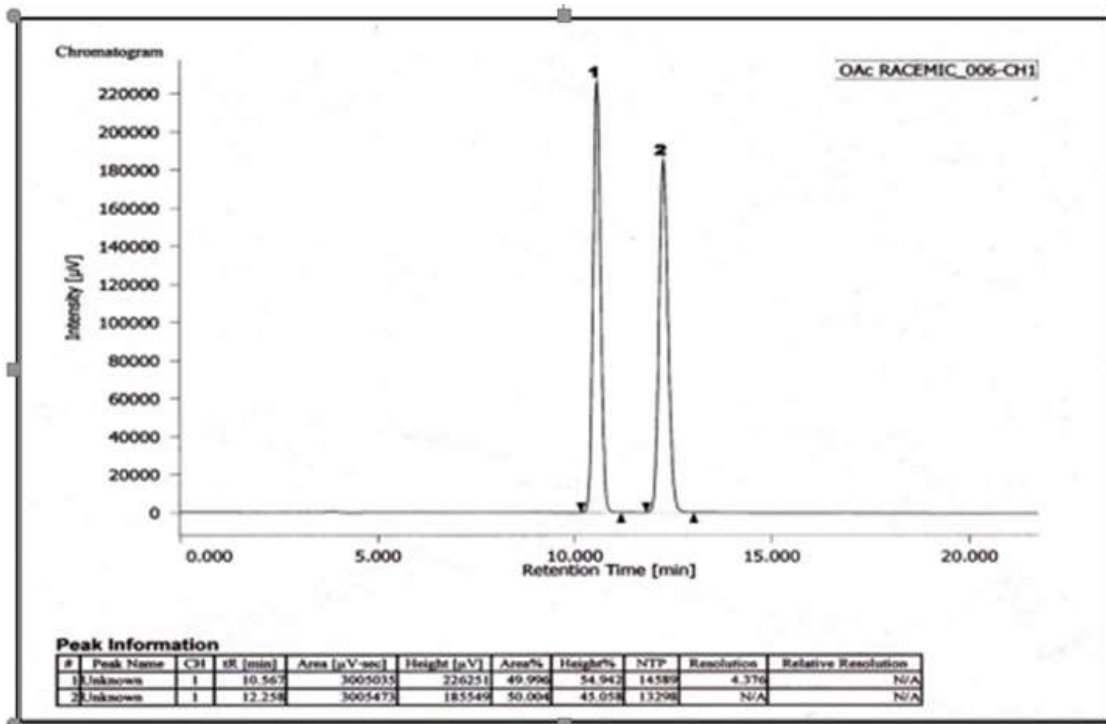

HPLC Condition for compound 1-(3-nitrophenyl)ethyl acetate Determined by HPLC analysis (chiral column Amylose, 1ml/min IPA (5.0%) in hexane; 11.23 min for (*R*)-**2** and 12.67 min for (*S*)-**2**)

(*R*) 1-(3-nitrophenyl)ethyl acetate

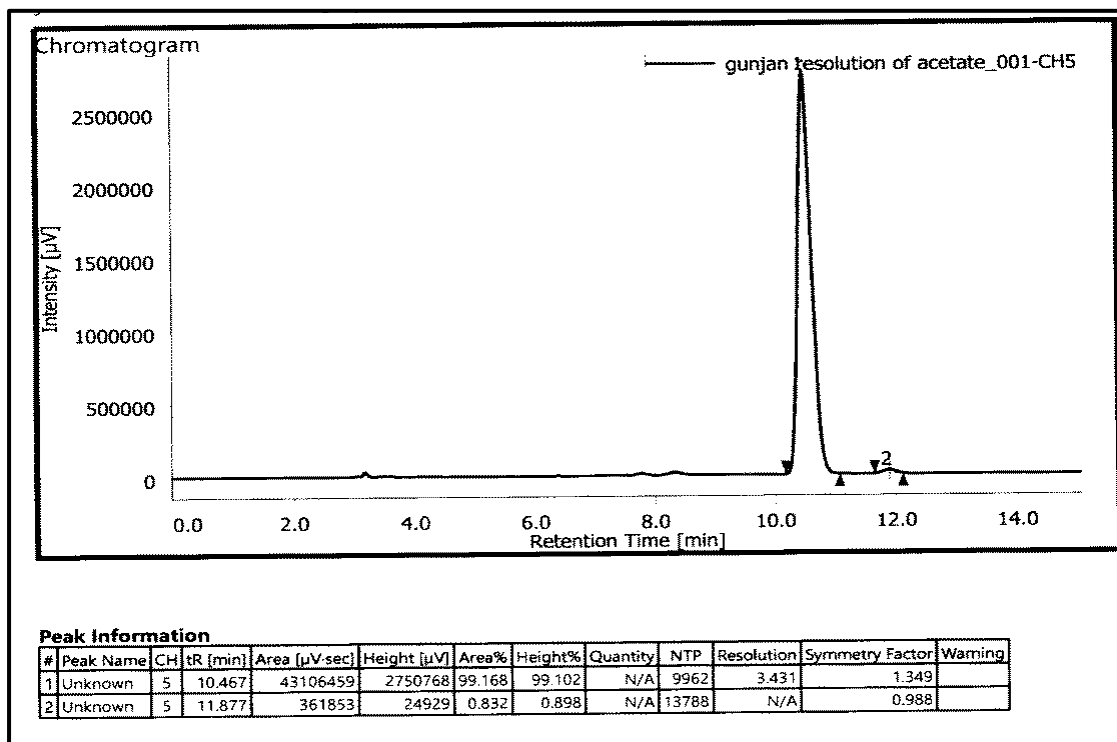

(R) 1-(3-nitrophenyl)ethan-1-ol after mitsunobu

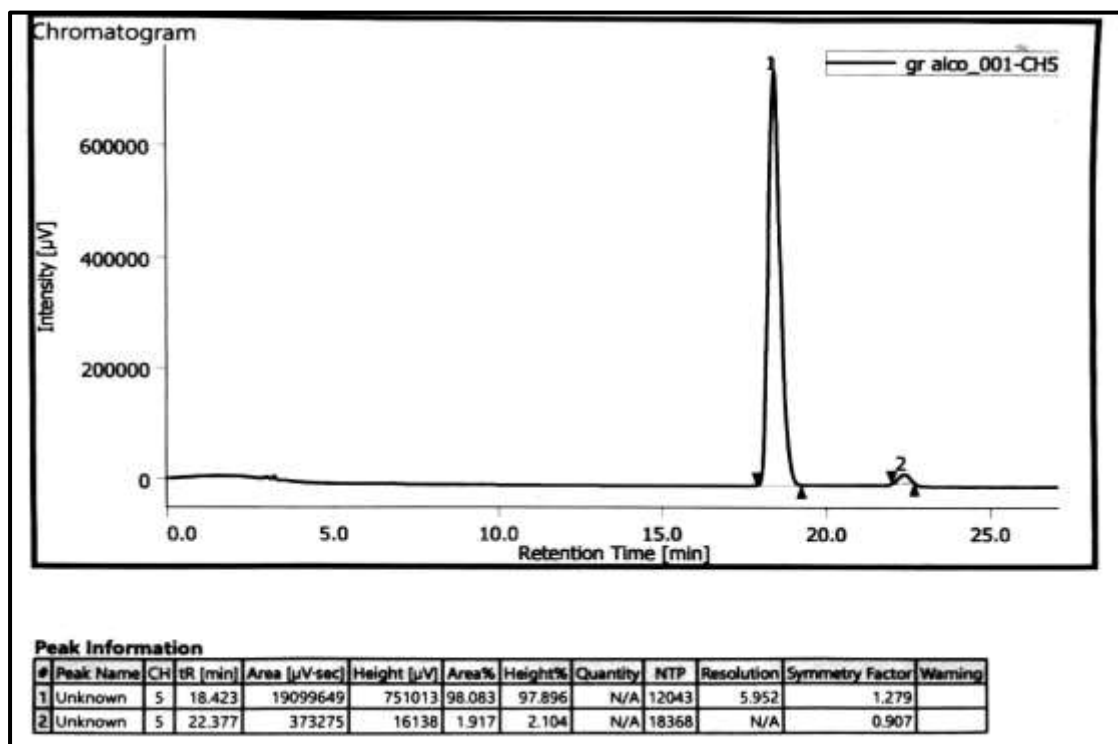

<sup>1</sup>H NMR of 1-(4-chlorophenyl)ethyl acetate

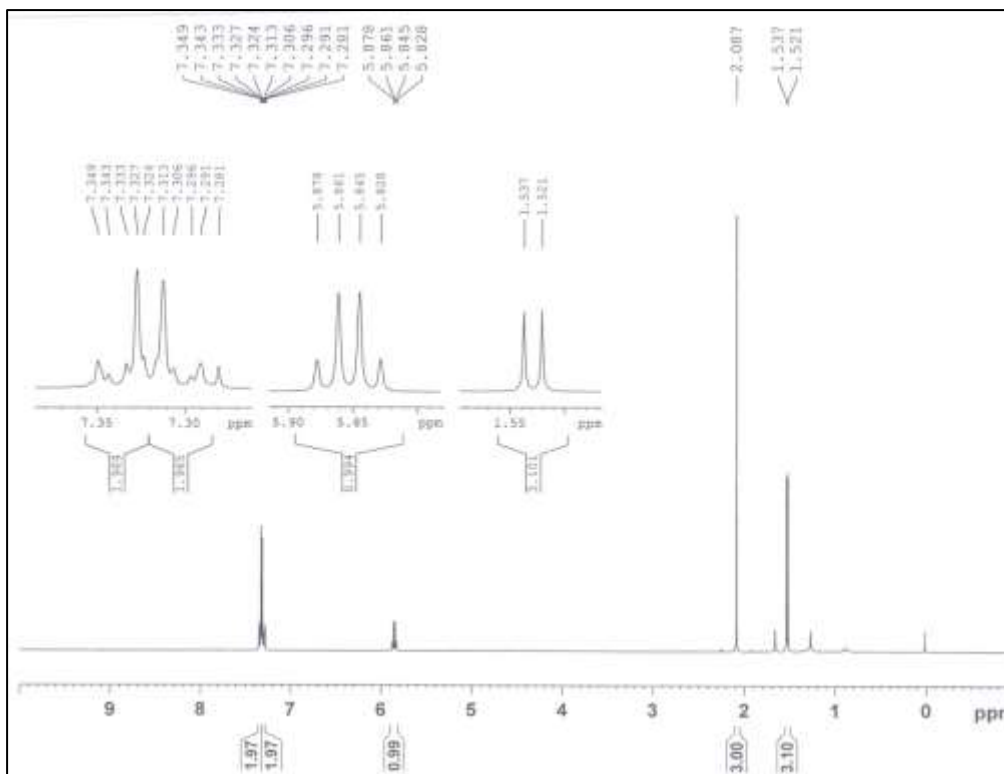

<sup>1</sup>H NMR of 1-(4-chlorophenyl)ethan-1-ol

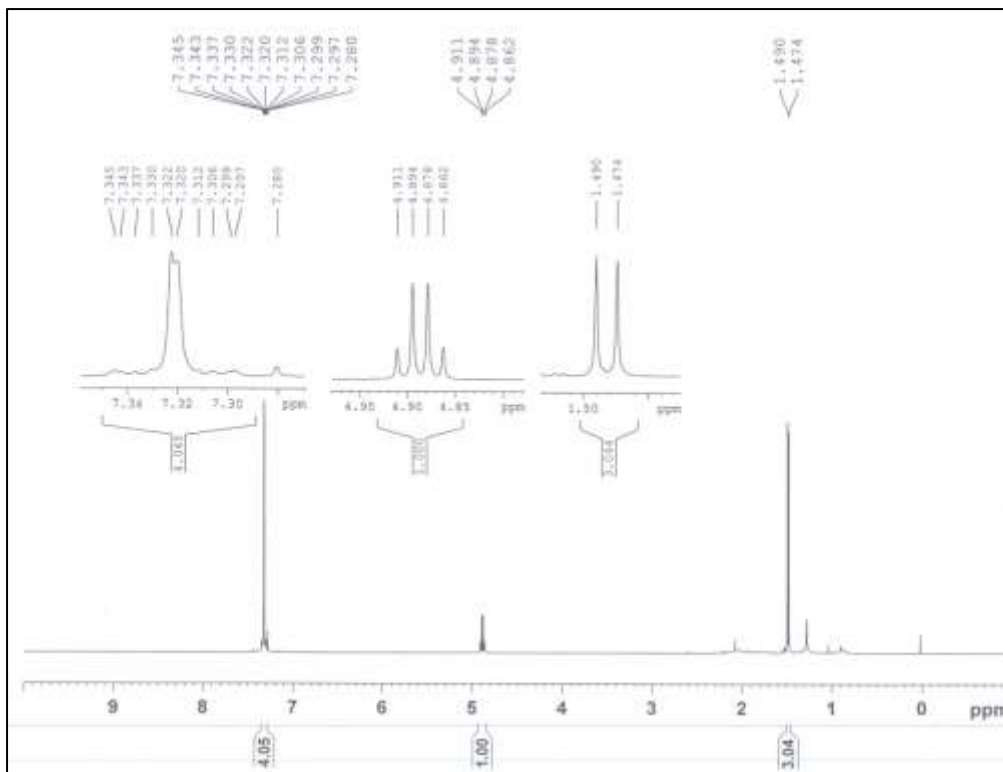

## HPLC of racemic 1-(4-chlorophenyl)ethan-1-ol

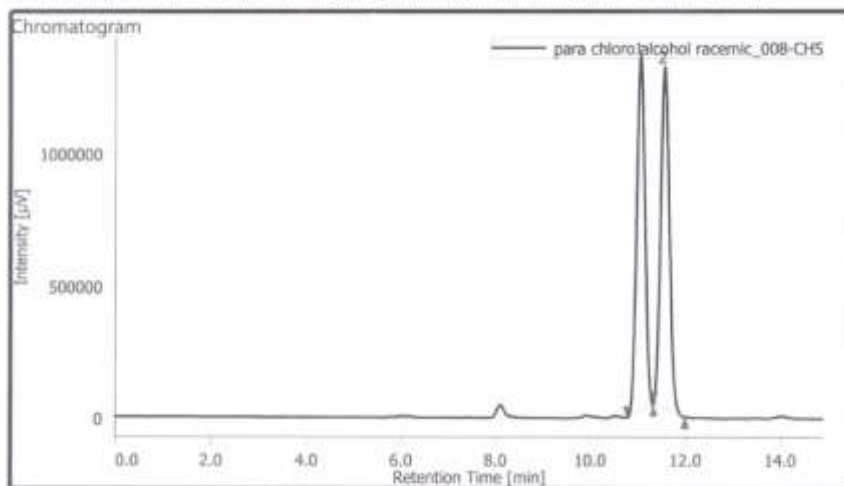

### Peak Information

| # | Peak Name | CH | tr [min] | Area [µVsec] | Height [µV] | Area%  | Height% | Quantity | NTP   | Resolution | Symmetry Factor | Warning |
|---|-----------|----|----------|--------------|-------------|--------|---------|----------|-------|------------|-----------------|---------|
| 1 | Unknown   | S  | 11.050   | 16235399     | 1345199     | 49.632 | 51.009  | N/A      | 18718 | 1.521      | 1.053           |         |
| 2 | Unknown   | S  | 11.553   | 16476054     | 1290000     | 50.368 | 48.991  | N/A      | 18430 | N/A        | 1.134           |         |

HPLC Condition for compound 1-(4-chlorophenyl)ethan-1-ol Determined by HPLC analysis (chiral column OD-H, 0.5ml/min IPA (10.0%) in hexane 11.05 min for (*R*)-**3** and 11.53 min for (*S*)-**3**)

## HPLC of (*S*) 1-(4-chlorophenyl)ethan-1-ol

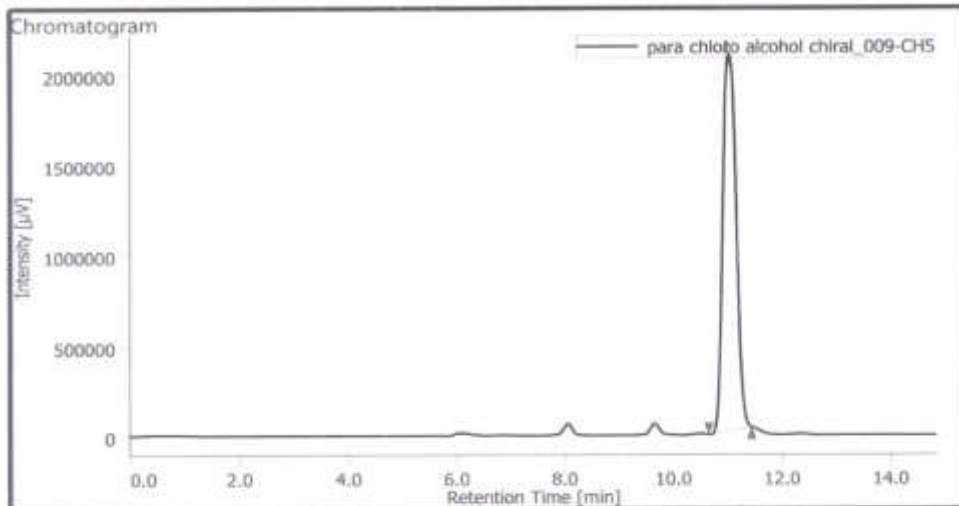

### Peak Information

| # | Peak Name | CH | tr [min] | Area [µVsec] | Height [µV] | Area%   | Height% | Quantity | NTP  | Resolution | Symmetry Factor | Warning |
|---|-----------|----|----------|--------------|-------------|---------|---------|----------|------|------------|-----------------|---------|
| 1 | Unknown   | S  | 11.030   | 35469976     | 2078323     | 100.000 | 100.000 | N/A      | 9134 | N/A        | 1.102           |         |



HPLC of Racemic 1-(4-chlorophenyl)ethyl acetate

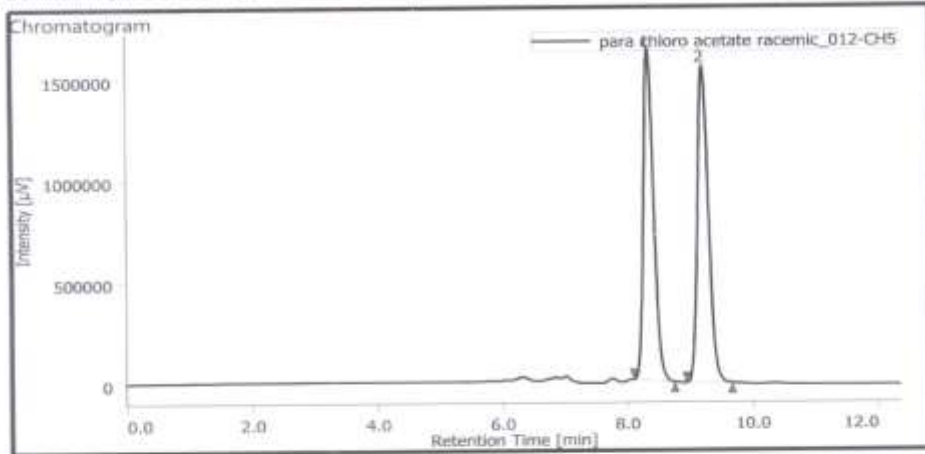

Peak Information

| # | Peak Name | CH | TR [min] | Area [µV-sec] | Height [µV] | Area%  | Height% | Quantity | NTP   | Resolution | Symmetry Factor | Warning |
|---|-----------|----|----------|---------------|-------------|--------|---------|----------|-------|------------|-----------------|---------|
| 1 | Unknown   | S  | 8.343    | 18488171      | 1635014     | 49.324 | 51.159  | N/A      | 12798 | 2.857      | 1.145           |         |
| 2 | Unknown   | S  | 9.210    | 18995098      | 1160906     | 50.676 | 48.841  | N/A      | 13449 | N/A        | 1.130           |         |

HPLC Condition for compound 1-(4-chlorophenyl)ethyl acetate Determined by HPLC analysis (chiral column Amylose, IPA 0.5ml/min (10.0%) in hexane; 8.34 min for (*R*)-4 and 9.20 min for (*S*)-4)

HPLC of (*R*) 1-(4-chlorophenyl)ethyl acetate

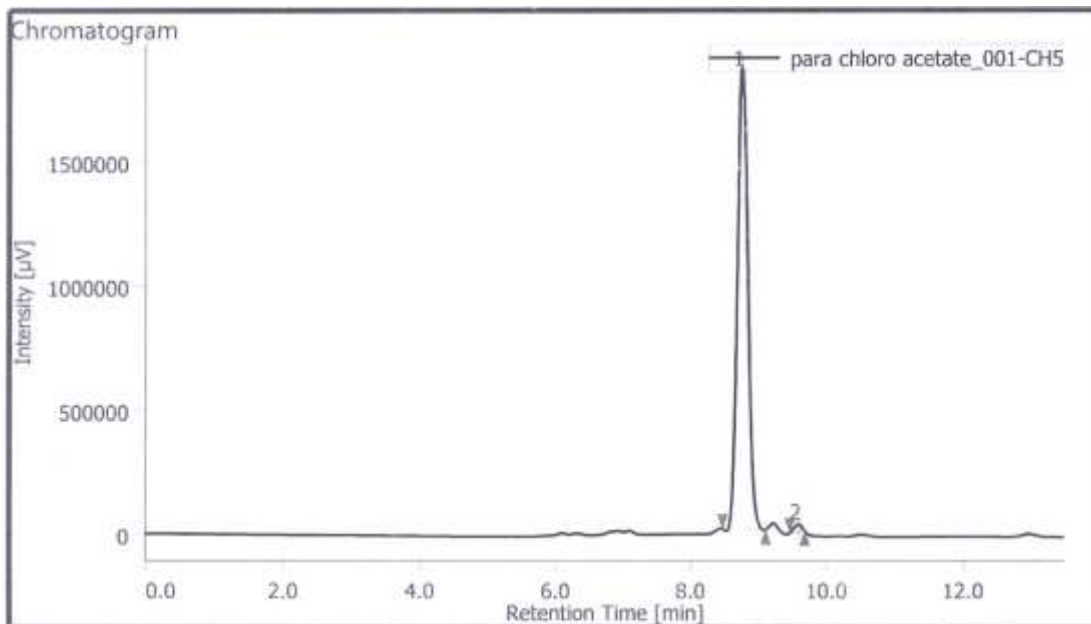

Peak Information

| # | Peak Name | CH | TR [min] | Area [µV-sec] | Height [µV] | Area%  | Height% | Quantity | NTP   | Resolution | Symmetry Factor | Warning |
|---|-----------|----|----------|---------------|-------------|--------|---------|----------|-------|------------|-----------------|---------|
| 1 | Unknown   | S  | 8.747    | 20124635      | 1859258     | 98.903 | 98.433  | N/A      | 14970 | 3.336      | 1.178           |         |
| 2 | Unknown   | S  | 9.583    | 223115        | 29602       | 1.097  | 1.567   | N/A      | 31191 | N/A        | 0.865           |         |

HPLC of (R) 1-(4-chlorophenyl)ethan-1-ol after mitsunobu

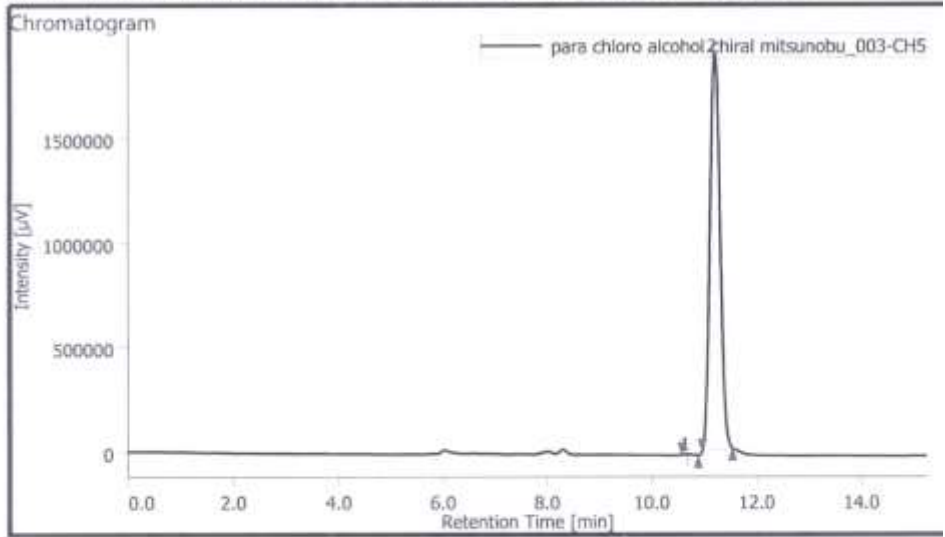

Peak Information

| # | Peak Name | CH | RT [min] | Area [µV-sec] | Height [µV] | Area%  | Height% | Quantity | NTP   | Resolution | Symmetry Factor | Warning |
|---|-----------|----|----------|---------------|-------------|--------|---------|----------|-------|------------|-----------------|---------|
| 1 | Unknown   | S  | 10.673   | 28618         | 3235        | 0.112  | 0.171   | N/A      | 28432 | 1.703      | 1.201           |         |
| 2 | Unknown   | S  | 11.193   | 25413159      | 1892494     | 99.888 | 99.829  | N/A      | 15549 | N/A        | 1.114           |         |

<sup>1</sup>H NMR of 1-(4-bromophenyl)ethan-1-ol

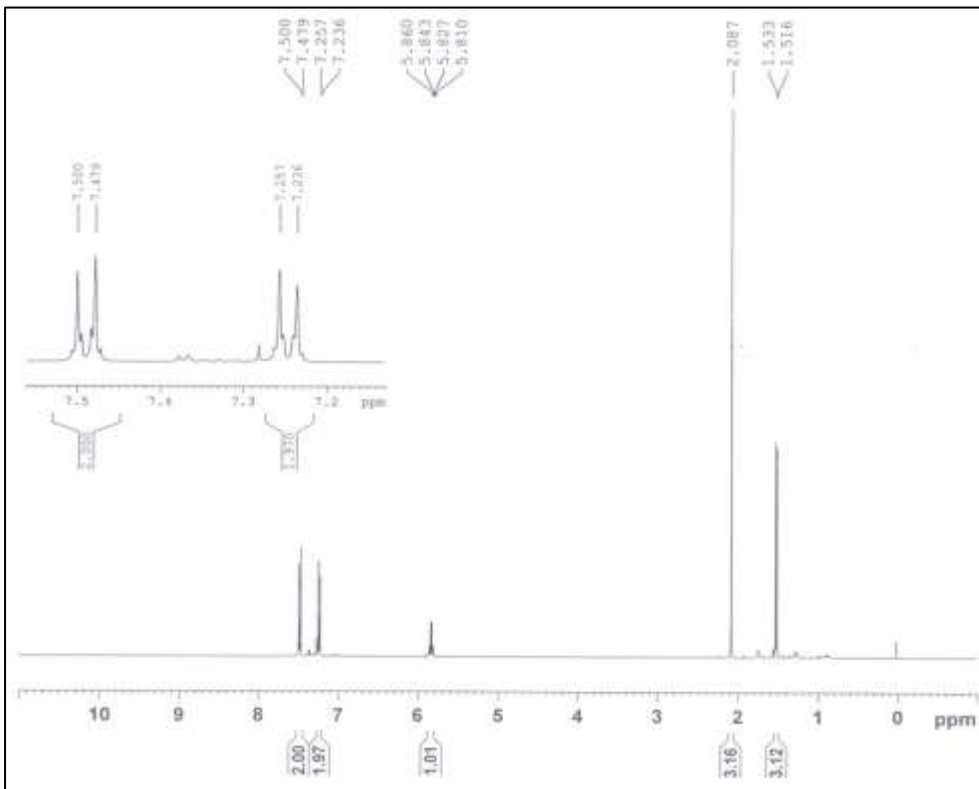

<sup>1</sup>H NMR of 1-(4-bromophenyl)ethyl acetate

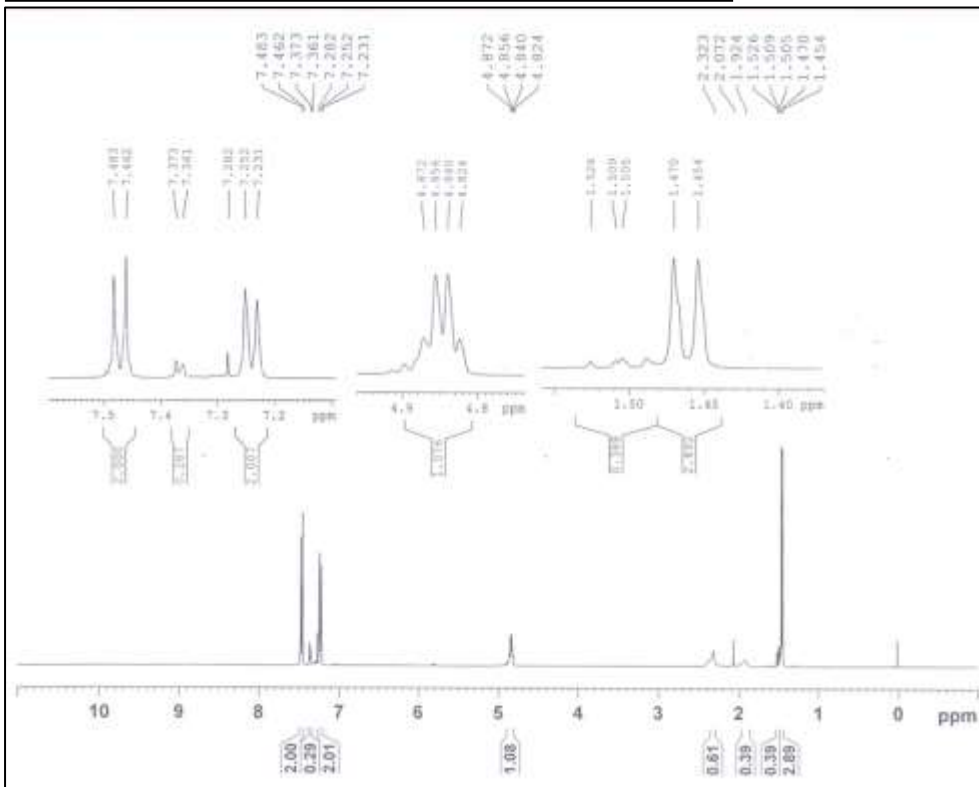

### HPLC of 1-(4-bromophenyl)ethyl acetate

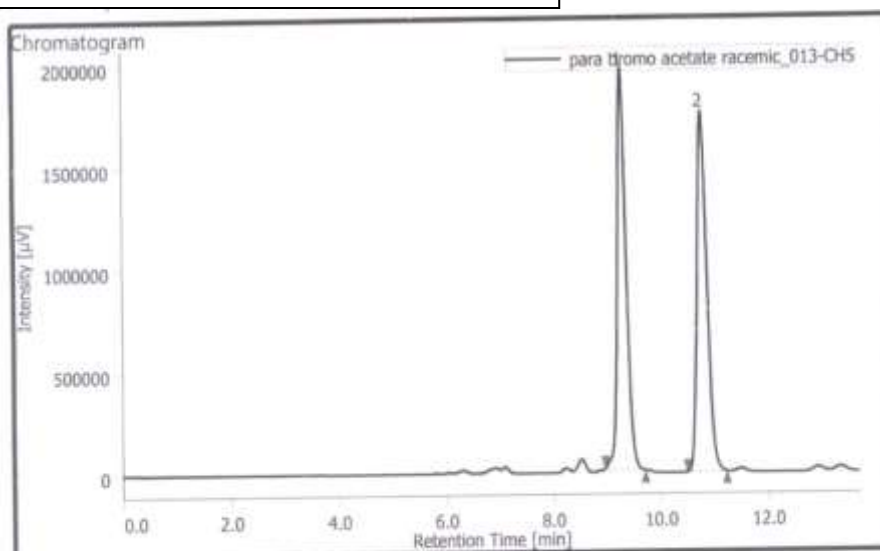

#### Peak Information

| # | Peak Name | CH | tR [min] | Area [µV·sec] | Height [µV] | Area%  | Height% | Quantity | NTP   | Resolution | Symmetry Factor | Warning |
|---|-----------|----|----------|---------------|-------------|--------|---------|----------|-------|------------|-----------------|---------|
| 1 | Unknown   | S  | 9.287    | 22299548      | 1962149     | 49.691 | 52.707  | N/A      | 16590 | 4.790      | 1.130           |         |
| 2 | Unknown   | S  | 10.770   | 32577311      | 1760591     | 50.309 | 47.293  | N/A      | 16773 | N/A        | 1.199           |         |

HPLC Condition for compound 1-(4-bromophenyl)ethyl acetate Determined by HPLC analysis (chiral column Amylose, 0.5ml/min IPA (10.0%) in hexane; 9.28 min for (*R*)-6 and 10.77 min for (*S*)-6

### HPLC of (*R*) 1-(4-bromophenyl)ethyl acetate

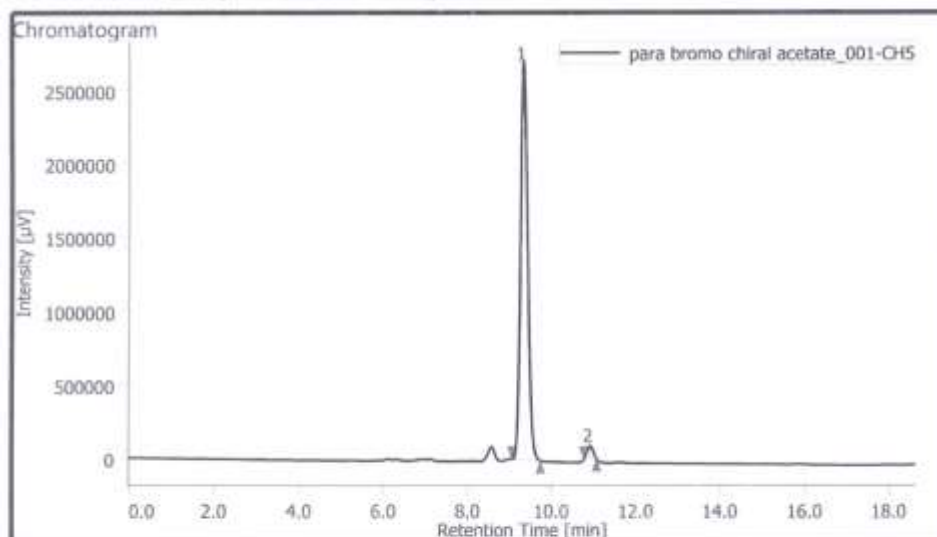

#### Peak Information

| # | Peak Name | CH | tR [min] | Area [µV·sec] | Height [µV] | Area%  | Height% | Quantity | NTP   | Resolution | Symmetry Factor | Warning |
|---|-----------|----|----------|---------------|-------------|--------|---------|----------|-------|------------|-----------------|---------|
| 1 | Unknown   | S  | 9.330    | 31956428      | 2702481     | 97.366 | 96.913  | N/A      | 14719 | 5.363      | 1.219           |         |
| 2 | Unknown   | S  | 10.920   | 864578        | 86085       | 2.634  | 3.087   | N/A      | 23173 | N/A        | 0.969           |         |

HPLC of 1-(4-bromophenyl)ethan-1-ol

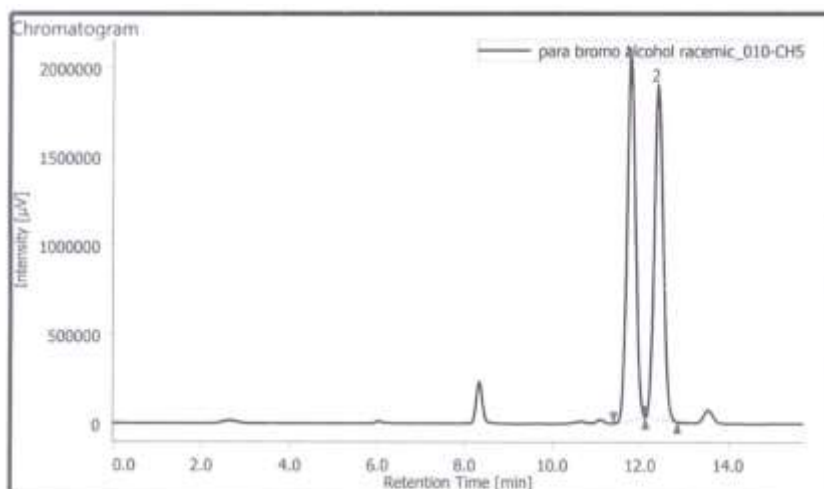

Peak Information

| # | Peak Name | CH | tR [min] | Area [µVsec] | Height [µV] | Area%  | Height% | Quantity | NTP   | Resolution | Symmetry Factor | Warning |
|---|-----------|----|----------|--------------|-------------|--------|---------|----------|-------|------------|-----------------|---------|
| 1 | Unknown   | S  | 11.773   | 27387943     | 2030146     | 50.863 | 51.978  | N/A      | 17503 | 1.708      | 1.083           |         |
| 2 | Unknown   | S  | 12.393   | 26458181     | 1875631     | 49.137 | 48.022  | N/A      | 17748 | N/A        | 1.121           |         |

HPLC Condition for compound 1-(4-bromophenyl)ethan-1-ol Determined by HPLC analysis (chiral column OD-H, 0.5ml/min IPA (10.0%) in hexane; 11.77 min for (*R*)-**5** and 12.39 min for (*S*)-**5**)

HPLC of (*S*) 1-(4-bromophenyl)ethan-1-ol

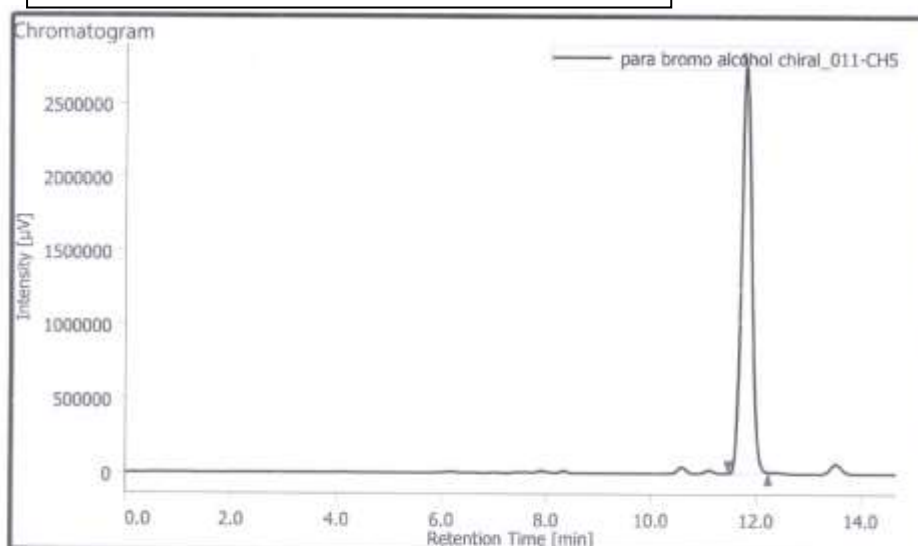

Peak Information

| # | Peak Name | CH | tR [min] | Area [µVsec] | Height [µV] | Area%   | Height% | Quantity | NTP   | Resolution | Symmetry Factor | Warning |
|---|-----------|----|----------|--------------|-------------|---------|---------|----------|-------|------------|-----------------|---------|
| 1 | Unknown   | S  | 11.783   | 36958061     | 2744524     | 100.000 | 100.000 | N/A      | 17760 | N/A        | 1.106           |         |

HPLC of (*R*) 1-(4-bromophenyl)ethan-1-ol after mitsunobu

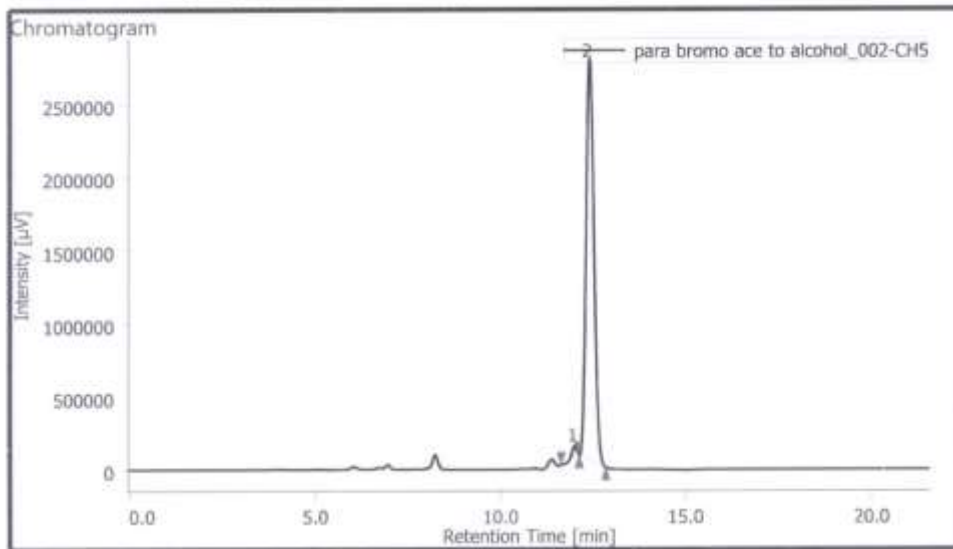

Peak Information

| # | Peak Name | CH | tR [min] | Area [µV·sec] | Height [µV] | Area%  | Height% | Quantity | NTP   | Resolution | Symmetry Factor | Warning |
|---|-----------|----|----------|---------------|-------------|--------|---------|----------|-------|------------|-----------------|---------|
| 1 | Unknown   | 5  | 12.007   | 763814        | 81596       | 1.843  | 2.869   | N/A      | 32896 | 1.215      | 0.838           |         |
| 2 | Unknown   | 5  | 12.407   | 40691051      | 2742474     | 98.157 | 97.111  | N/A      | 15756 | N/A        | 1.157           |         |

<sup>1</sup>H NMR of 1-(p-tolyl)ethan-1-ol

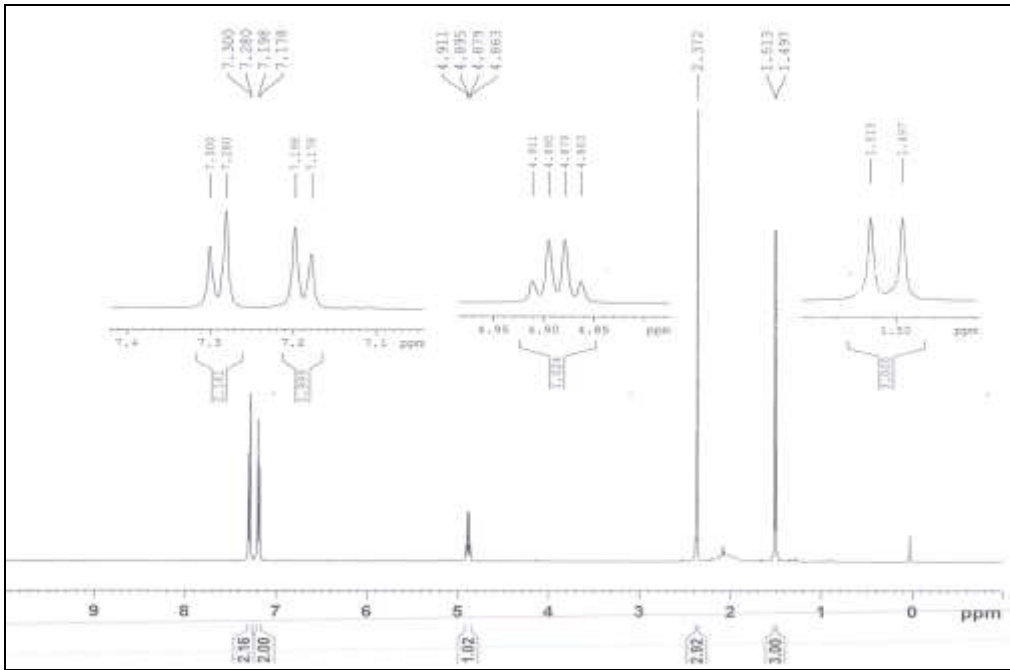

<sup>1</sup>H NMR of 1-(p-tolyl)ethyl acetate

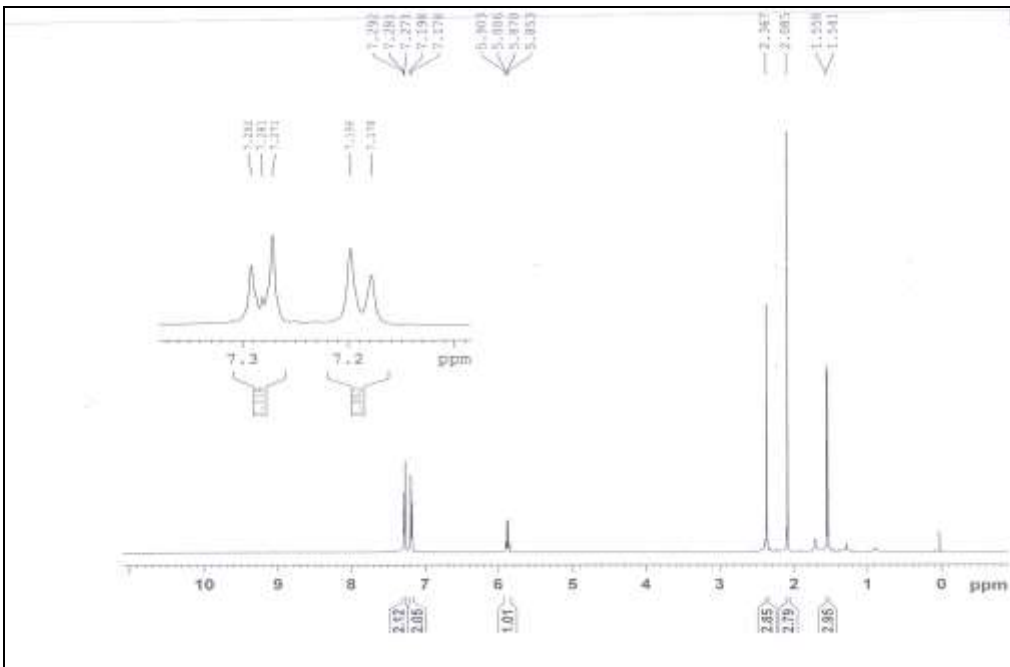

## HPLC of Racemic 1-(p-tolyl)ethan-1-ol

para methyl and para bromo, 0701 para methyl racemic alcohol, 011 01-07-2019 16:15:01

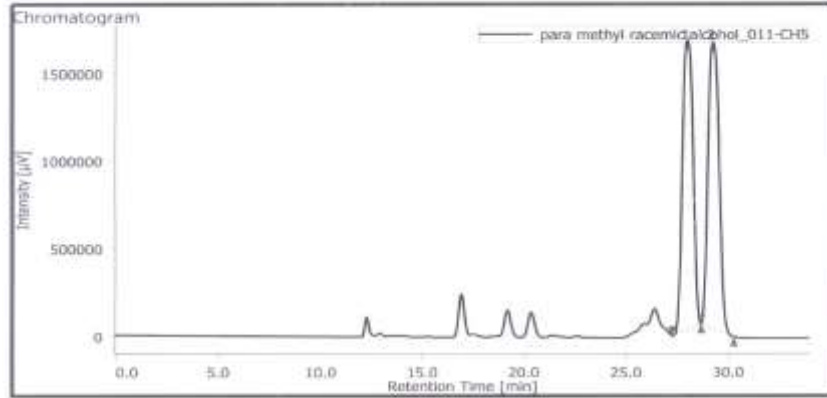

### Peak Information

| # | Peak Name | CH | TR [min] | Area [µV-sec] | Height [µV] | Area%  | Height% | Quantity | NTP   | Resolution | Symmetry Factor | Warning |
|---|-----------|----|----------|---------------|-------------|--------|---------|----------|-------|------------|-----------------|---------|
| 1 | Unknown   | S  | 27.987   | 33324754      | 1544421     | 45.070 | 50.254  | N/A      | 12628 | 1.128      | 1.044           |         |
| 2 | Unknown   | S  | 29.233   | 61573086      | 1627809     | 50.930 | 49.746  | N/A      | 12685 | N/A        | 1.126           |         |

HPLC Condition for compound 1-(p-tolyl)ethan-1-ol Determined by HPLC analysis (chiral column IE, 0.25ml/min IPA (5.0%) in hexane; 27.98 min for (R)-7 and 29.23 min for (S)-7)

## HPLC (S) 1-(p-tolyl)ethan-1-ol

alpha naphthyl and para methyl, 0724 para methyl alcohol, 005 24-07-2019 17:30:28

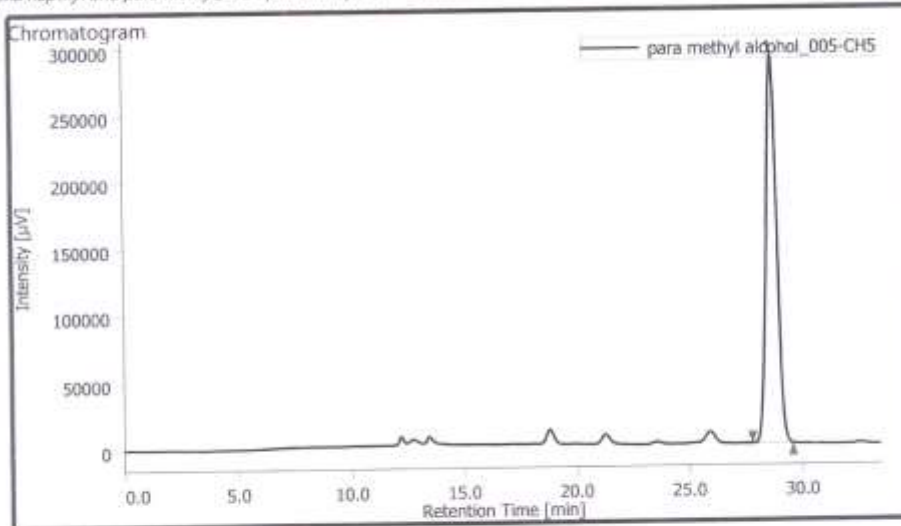

### Peak Information

| # | Peak Name | CH | TR [min] | Area [µV-sec] | Height [µV] | Area%   | Height% | Quantity | NTP   | Resolution | Symmetry Factor | Warning |
|---|-----------|----|----------|---------------|-------------|---------|---------|----------|-------|------------|-----------------|---------|
| 1 | Unknown   | S  | 28.663   | 9456494       | 290024      | 100.000 | 100.000 | N/A      | 17621 | N/A        | 1.052           |         |



### HPLC of Racemic 1-(p-tolyl)ethyl acetate

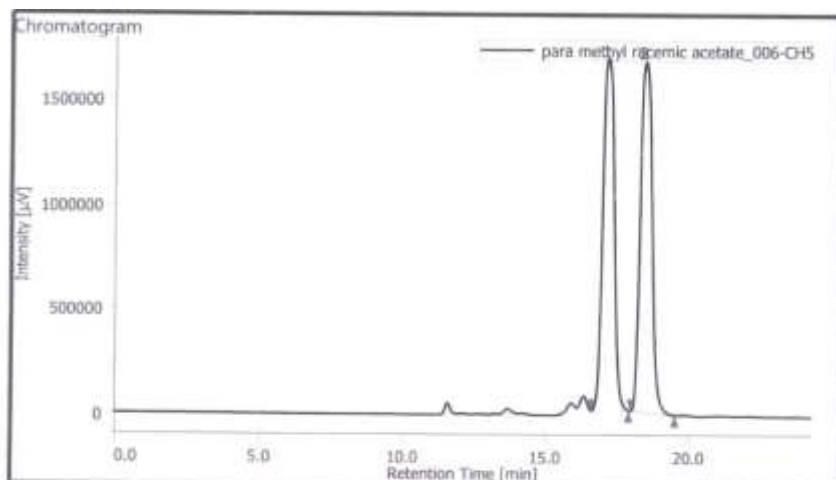

#### Peak Information

| # | Peak Name | CH | RT [min] | Area [uV-sec] | Height [uV] | Area%  | Height% | Quantity | NTP  | Resolution | Symmetry Factor | Warning |
|---|-----------|----|----------|---------------|-------------|--------|---------|----------|------|------------|-----------------|---------|
| 1 | Unknown   | S  | 17.120   | 48375292      | 1481123     | 48.727 | 50.165  | N/A      | 8572 | 1.751      | 1.172           |         |
| 2 | Unknown   | S  | 18.423   | 46884083      | 1670066     | 50.273 | 49.835  | N/A      | 9581 | N/A        | 1.346           |         |

HPLC Condition for compound 1-(p-tolyl)ethyl acetate Determined by HPLC analysis (chiral column Amylose, 1ml/min IPA (20.0%) in hexane; 4.003 min for (*R*)-**8** and 4.25 min for (*S*)-**8**)

### HPLC of (*R*) 1-(p-tolyl)ethyl acetate

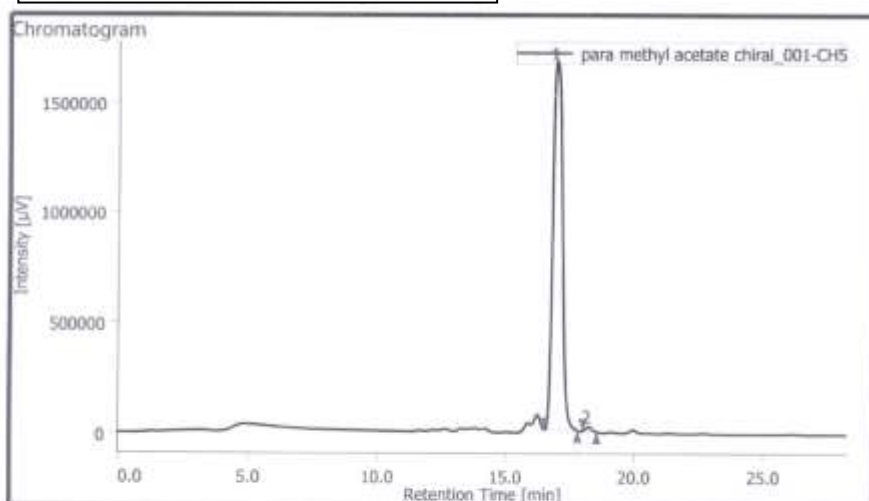

#### Peak Information

| # | Peak Name | CH | RT [min] | Area [uV-sec] | Height [uV] | Area%  | Height% | Quantity | NTP   | Resolution | Symmetry Factor | Warning |
|---|-----------|----|----------|---------------|-------------|--------|---------|----------|-------|------------|-----------------|---------|
| 1 | Unknown   | S  | 16.980   | 43121062      | 1671463     | 99.175 | 98.761  | N/A      | 9534  | 2.136      | 1.161           |         |
| 2 | Unknown   | S  | 18.233   | 358680        | 20979       | 0.825  | 1.239   | N/A      | 22993 | N/A        | 1.153           |         |

# HPLC (R) 1-(p-tolyl)ethan-1-ol after misunobu

para methyl ace to alcohol\_0913 para methyl ace to alcohol\_001 13-09-2019 10:30:19

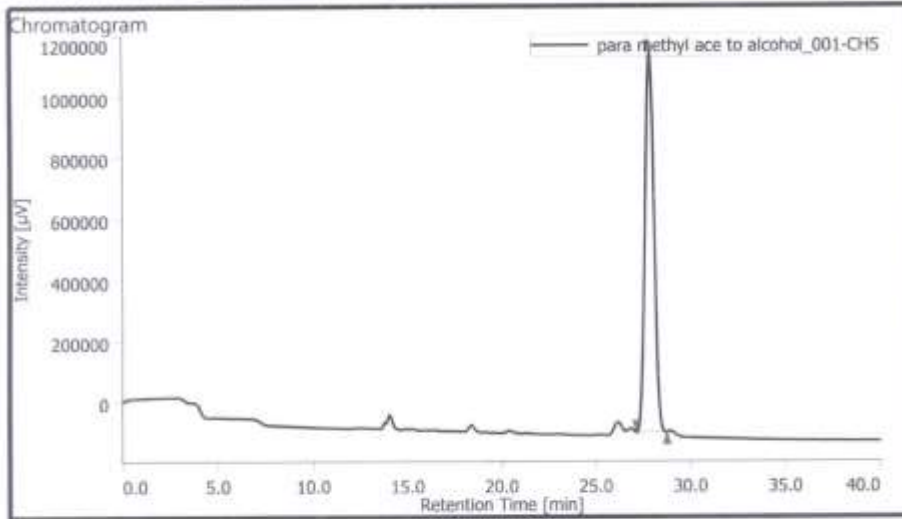

## Peak Information

| # | Peak Name | CH | IR [min] | Area [µVsec] | Height [µV] | Area%   | Height% | Quantity | NTP   | Resolution | Symmetry Factor | Warning |
|---|-----------|----|----------|--------------|-------------|---------|---------|----------|-------|------------|-----------------|---------|
| 1 | Unknown   | S  | 27.840   | 41456791     | 1241815     | 100.000 | 100.000 | N/A      | 15297 | N/A        | 1.059           |         |

$^1\text{H}$  NMR of 1-(naphthalen-1-yl)ethan-1-ol

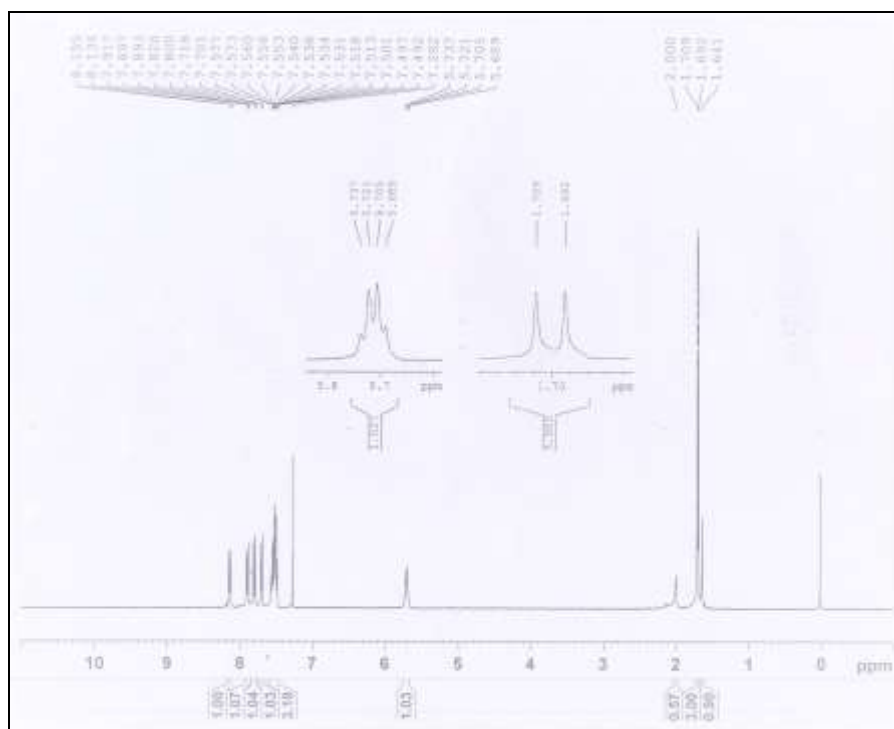

$^1\text{H}$  NMR of 1-(naphthalen-1-yl)ethyl acetate

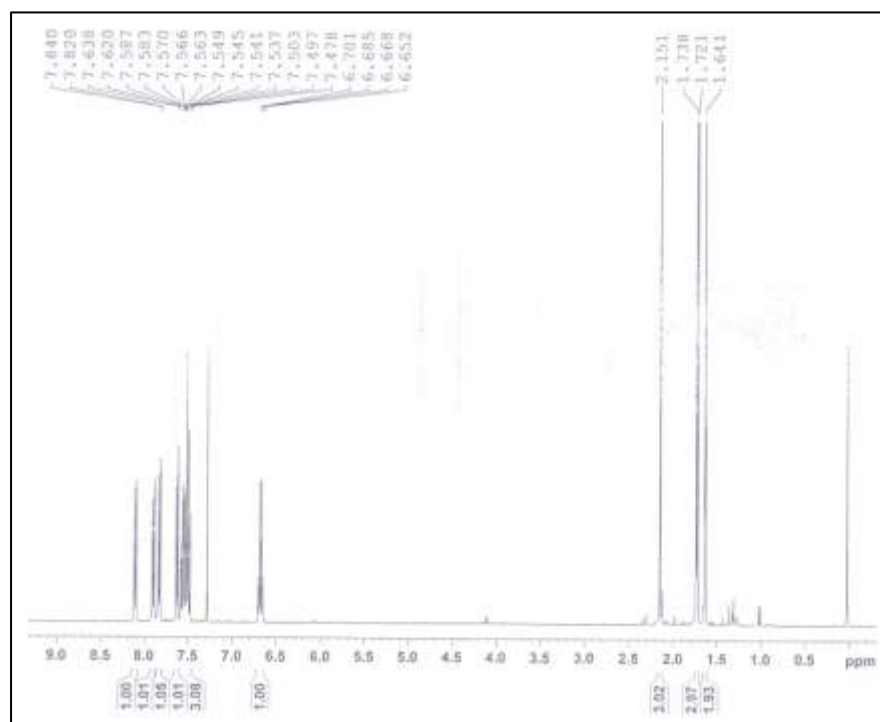

### HPLC of Racemic 1-(naphthalen-1-yl)ethan-1-ol

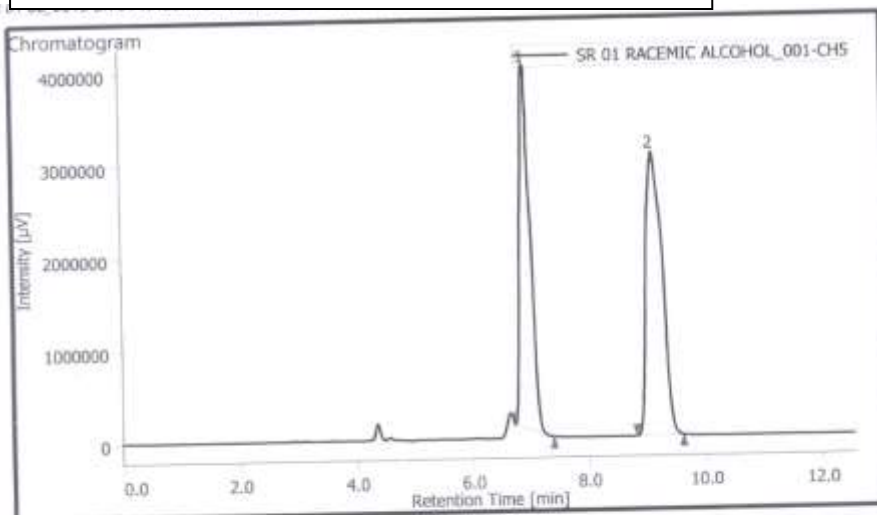

#### Peak Information

| # | Peak Name | Ch | IR [min] | Area [µV·sec] | Height [µV] | Area%  | Height% | Quantity | NTP  | Resolution | Symmetry Factor | Warning |
|---|-----------|----|----------|---------------|-------------|--------|---------|----------|------|------------|-----------------|---------|
| 1 | Unknown   | 5  | 6.913    | 48517814      | 3933567     | 45.422 | 56.202  | N/A      | 5853 | 4.875      | 1.273           |         |
| 2 | Unknown   | 5  | 9.113    | 58298850      | 3063352     | 54.578 | 43.798  | N/A      | 4348 | N/A        | 1.254           |         |

HPLC Condition for compound 1-(naphthalen-1-yl)ethan-1-ol Determined by HPLC analysis (chiral column OD-H, 1ml/min IPA (20.0%) in hexane; 6.91 min for (*R*)-**9** and 9.11 min for (*S*)-**9**)

### HPLC of (*S*) 1-(naphthalen-1-yl)ethan-1-ol

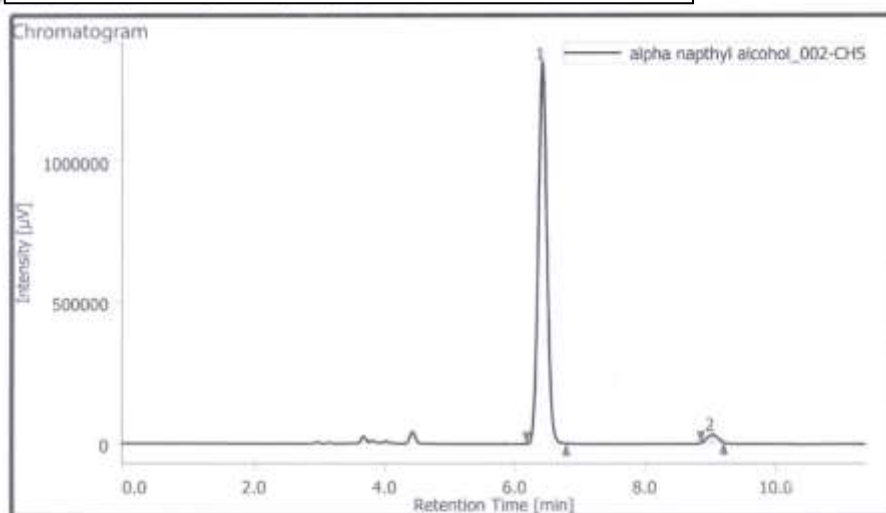

#### Peak Information

| # | Peak Name | Ch | IR [min] | Area [µV·sec] | Height [µV] | Area%  | Height% | Quantity | NTP   | Resolution | Symmetry Factor | Warning |
|---|-----------|----|----------|---------------|-------------|--------|---------|----------|-------|------------|-----------------|---------|
| 1 | Unknown   | 5  | 6.420    | 12472895      | 1351921     | 97.317 | 97.979  | N/A      | 11480 | 9.311      | 1.106           |         |
| 2 | Unknown   | 5  | 9.023    | 317575        | 27860       | 2.483  | 2.021   | N/A      | 12657 | N/A        | 1.006           |         |

### HPLC of Racemic 1-(naphthalen-1-yl)ethyl acetate

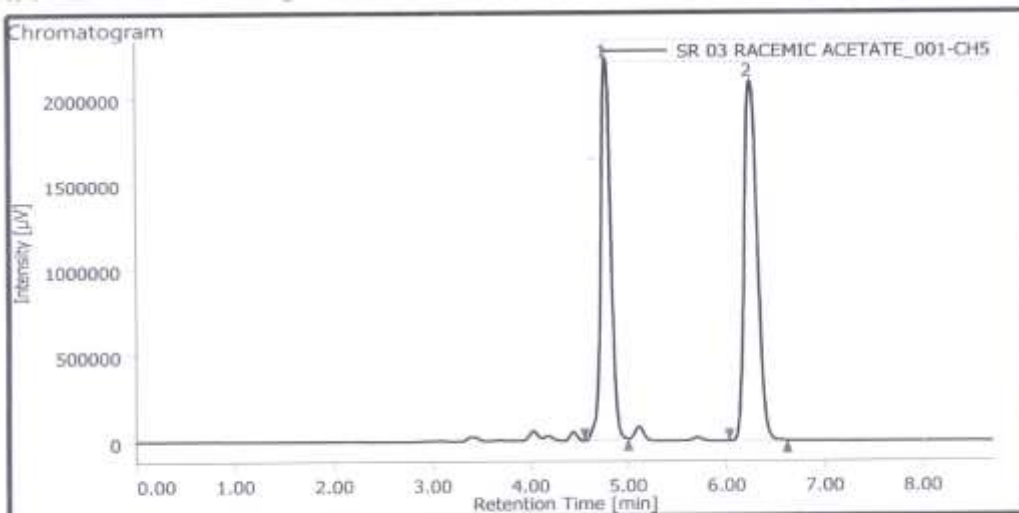

#### Peak Information

| # | Peak Name | CH | TR [min] | Area [µV-sec] | Height [µV] | Area%  | Height% | Quantity | NTP   | Resolution | Symmetry Factor | Warning |
|---|-----------|----|----------|---------------|-------------|--------|---------|----------|-------|------------|-----------------|---------|
| 1 | Unknown   | S  | 4.773    | 15687702      | 2212312     | 44.953 | 51.362  | N/A      | 11397 | 7.040      | 1.040           |         |
| 2 | Unknown   | S  | 6.250    | 19210335      | 2094995     | 55.047 | 48.638  | N/A      | 10692 | N/A        | 1.144           |         |

HPLC Condition for compound 1-(naphthalen-1-yl)ethyl acetate Determined by HPLC analysis (chiral column OD-H, 1ml/min IPA (10.0%) in hexane; 4.77 min for (*R*)-**10** and 6.20 min for (*S*)-**10**)

### HPLC of (*R*) 1-(naphthalen-1-yl)ethyl acetate

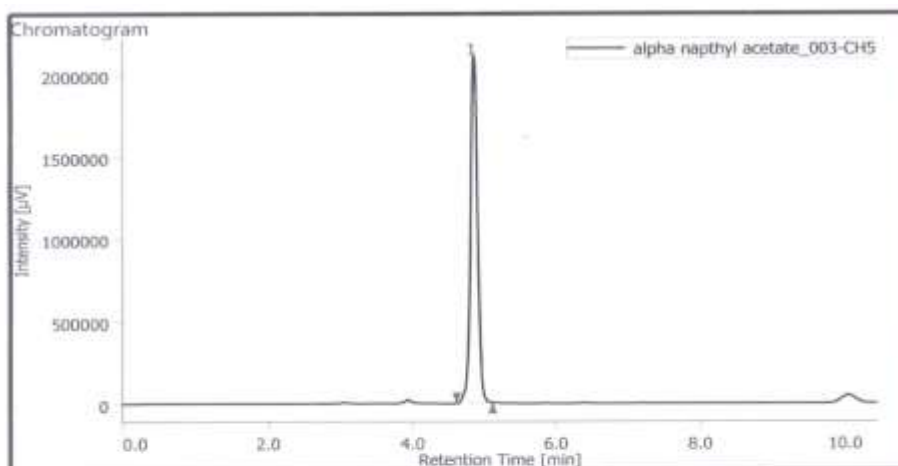

#### Peak Information

| # | Peak Name | CH | TR [min] | Area [µV-sec] | Height [µV] | Area%   | Height% | Quantity | NTP   | Resolution | Symmetry Factor | Warning |
|---|-----------|----|----------|---------------|-------------|---------|---------|----------|-------|------------|-----------------|---------|
| 1 | Unknown   | S  | 4.833    | 14607551      | 2106189     | 100.000 | 100.000 | N/A      | 13399 | N/A        | 1.031           |         |

HPLC of (R) 1-(naphthalen-1-yl)ethan-1-ol after mitsunobu

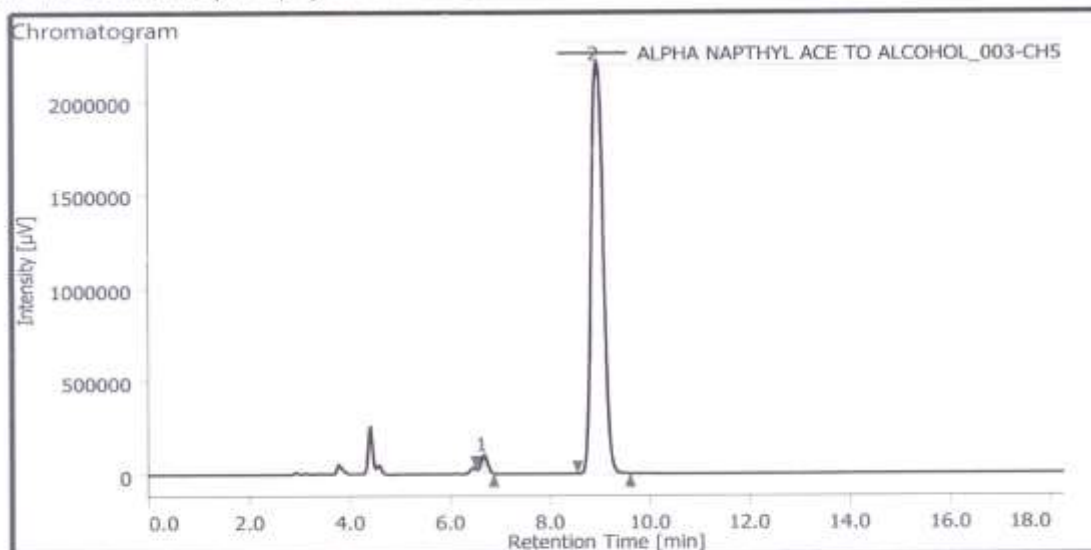

Peak Information

| # | Peak Name | Ch | tR [min] | Area [µV-sec] | Height [µV] | Area%  | Height% | Quantity | NTP   | Resolution | Symmetry Factor | Warning |
|---|-----------|----|----------|---------------|-------------|--------|---------|----------|-------|------------|-----------------|---------|
| 1 | Unknown   | 5  | 6.677    | 746834        | 86271       | 1.985  | 3.769   | N/A      | 12734 | 6.620      | 1.144           |         |
| 2 | Unknown   | 5  | 8.943    | 36884906      | 2202476     | 98.015 | 96.231  | N/A      | 6322  | N/A        | 1.164           |         |

$^1\text{H}$  NMR of 1-(3,4-difluorophenyl)ethan-1-ol

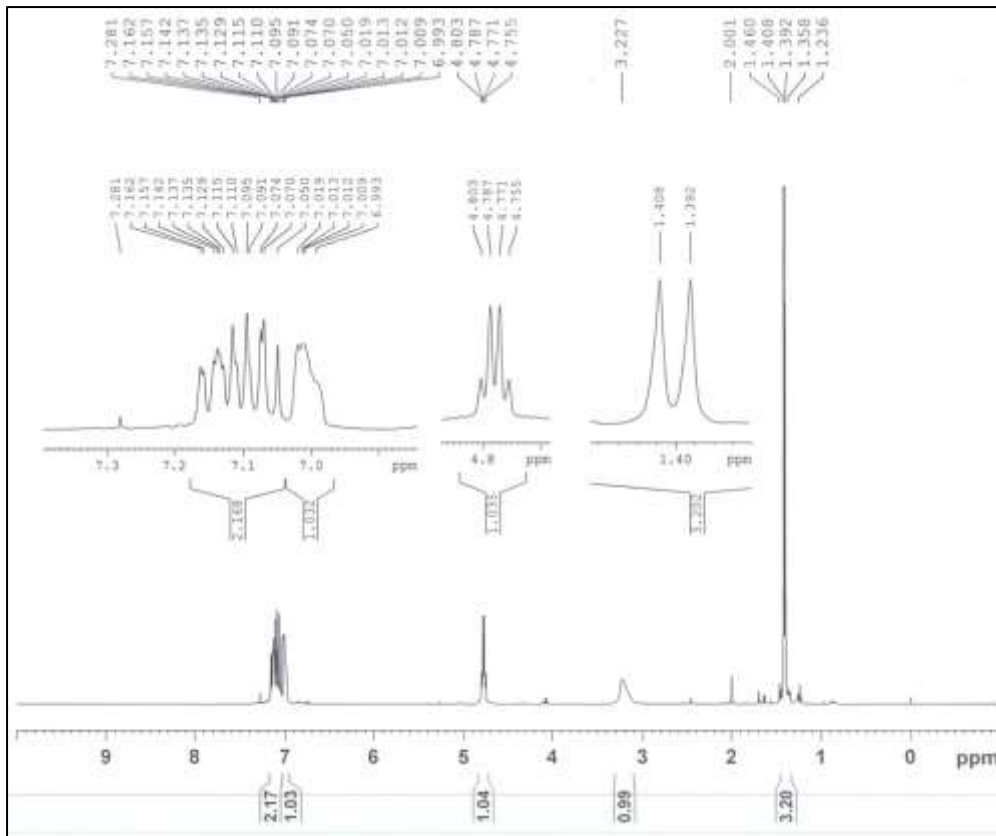

$^1\text{H}$  NMR of 1-(3,4-difluorophenyl)ethyl acetate

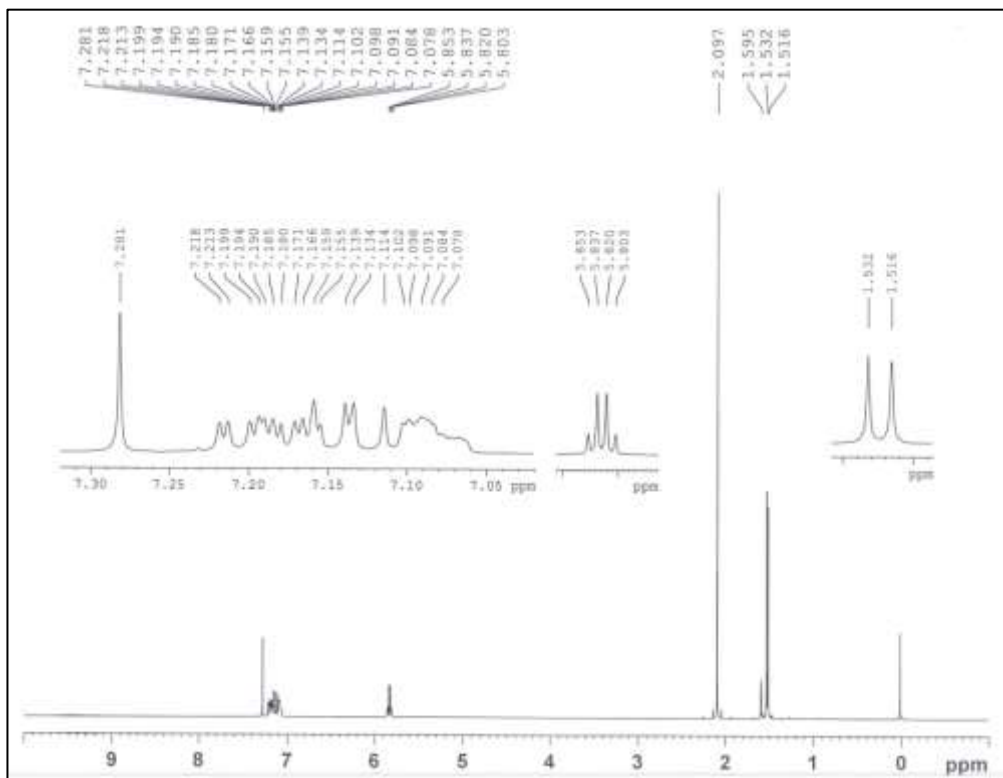

## HPLC of Racemic 1-(3,4-difluorophenyl)ethan-1-ol

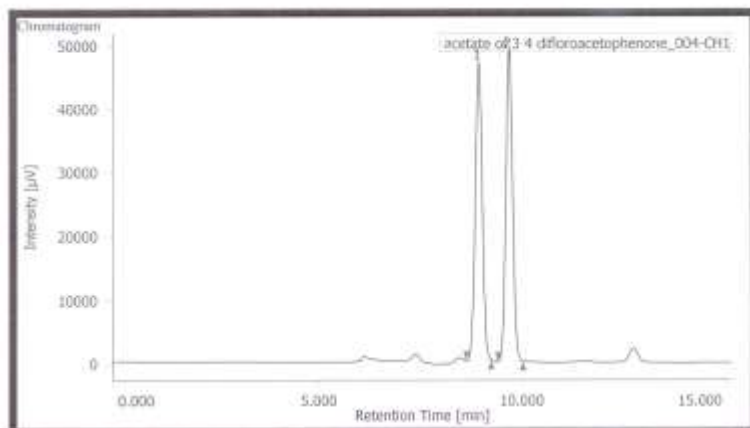

### Peak Information

| # | Peak Name | CH | RT [min] | Area [µV-sec] | Height [µV] | Area%  | Height% | Quantity | NTP   | Resolution | Symmetry Factor | Warning |
|---|-----------|----|----------|---------------|-------------|--------|---------|----------|-------|------------|-----------------|---------|
| 1 | Unknown   | 1  | 8.956    | 560730        | 46842       | 49.865 | 48.874  | N/A      | 13899 | 1.411      | 0.072           |         |
| 2 | Unknown   | 1  | 9.602    | 561732        | 49004       | 58.135 | 51.125  | N/A      | 16219 | N/A        | 1.054           |         |

HPLC Condition for compound 1-(3,4-difluorophenyl)ethan-1-ol Determined by HPLC analysis (chiral column Amylose, 0.25ml/min IPA (7.0%) in hexane; 8.9 min for (*R*)-**11** and 9.6 min for (*S*)-**11**)

## HPLC of (*S*) 1-(3,4-difluorophenyl)ethan-1-ol

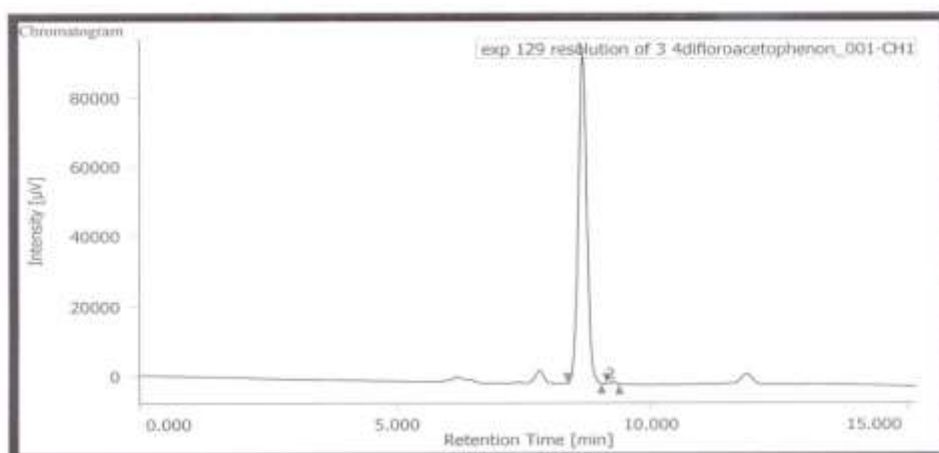

### Peak Information

| # | Peak Name | CH | RT [min] | Area [µV-sec] | Height [µV] | Area%  | Height% | Quantity | NTP   | Resolution | Symmetry Factor | Warning |
|---|-----------|----|----------|---------------|-------------|--------|---------|----------|-------|------------|-----------------|---------|
| 1 | Unknown   | 1  | 8.658    | 1090906       | 84074       | 99.644 | 99.508  | N/A      | 13183 | 1.184      | 1.005           |         |
| 2 | Unknown   | 1  | 9.250    | 3931          | 465         | 0.354  | 0.492   | N/A      | 23520 | N/A        | 1.004           |         |



HPLC of (R) 1-(3,4-difluorophenyl)ethan-1-ol

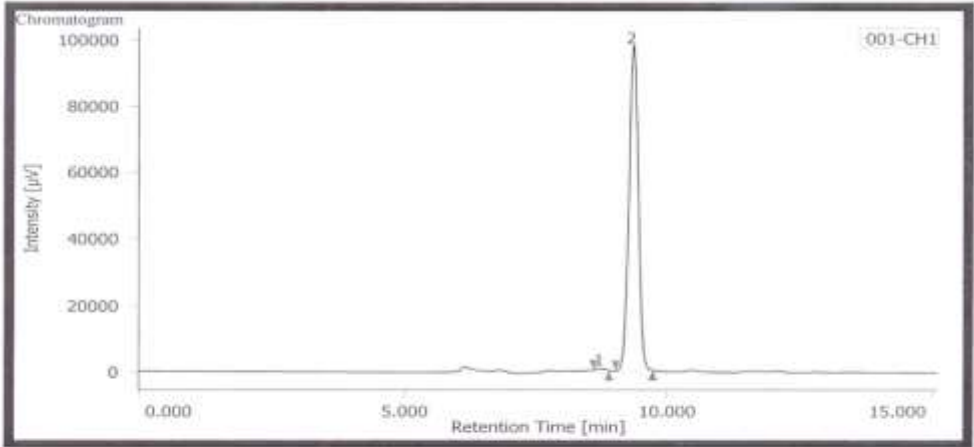

**Peak Information**

| # | Peak Name | CH | RT [min] | Area [µV·sec] | Height [µV] | Area%  | Height% | Quantity | NTP   | Resolution | Symmetry Factor | Warning |
|---|-----------|----|----------|---------------|-------------|--------|---------|----------|-------|------------|-----------------|---------|
| 1 | Unknown   | 1  | 8.756    | 5133          | 531         | 0.426  | 0.529   | N/A      | 16203 | 2.018      | 0.970           |         |
| 2 | Unknown   | 1  | 9.358    | 1216705       | 98037       | 99.588 | 99.461  | N/A      | 12806 | N/A        | 1.017           |         |

HPLC of (R) 1-(3,4-difluorophenyl)ethan-1-ol after mitsunobu

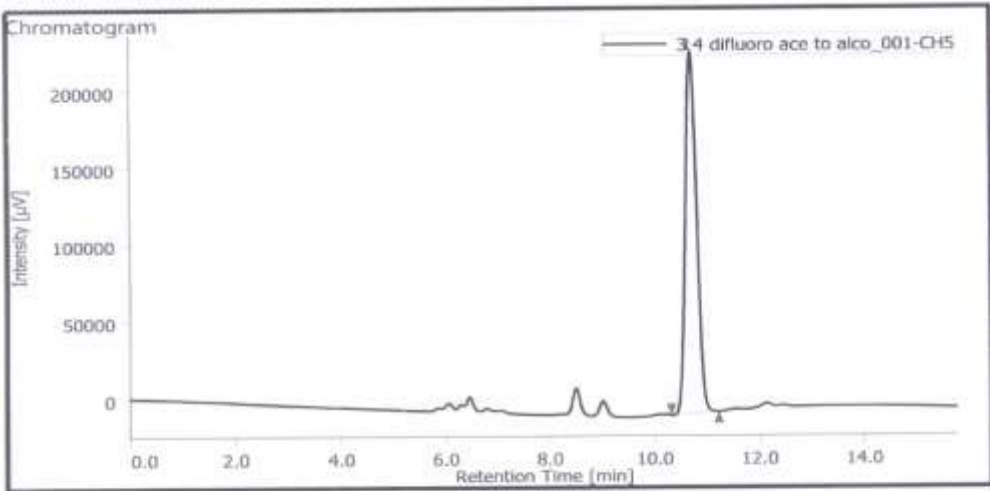

**Peak Information**

| # | Peak Name | CH | RT [min] | Area [µV·sec] | Height [µV] | Area%   | Height% | Quantity | NTP   | Resolution | Symmetry Factor | Warning |
|---|-----------|----|----------|---------------|-------------|---------|---------|----------|-------|------------|-----------------|---------|
| 1 | Unknown   | 5  | 10.700   | 3515098       | 234164      | 100.000 | 100.000 | N/A      | 11219 | N/A        | 1.090           |         |

<sup>1</sup>H NMR of 1,2,3,4-tetrahydronaphthalen-1-ol

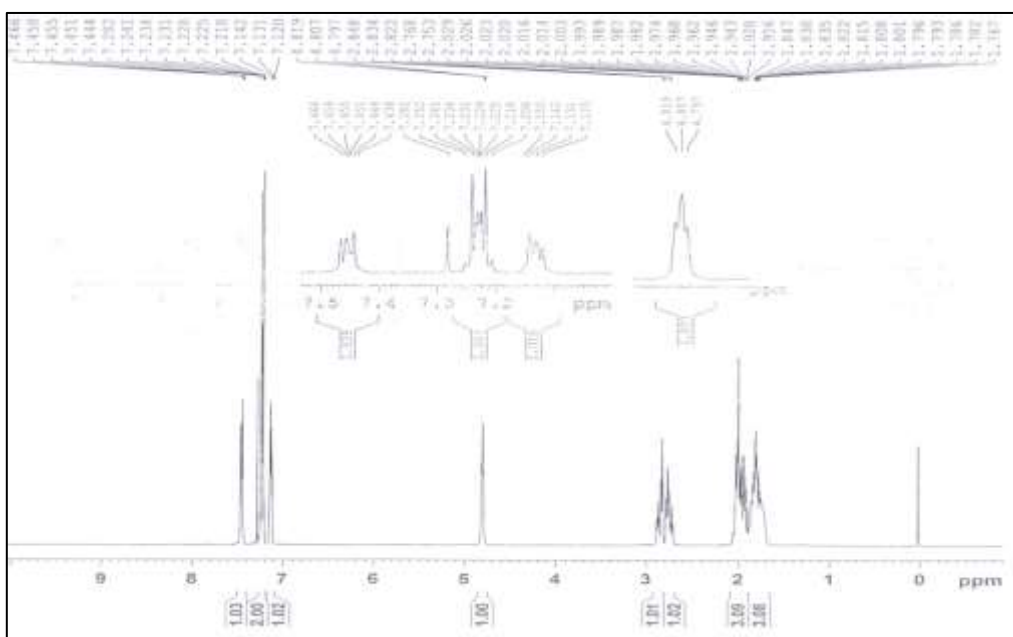

<sup>1</sup>H NMR of 1,2,3,4-tetrahydronaphthalen-1-yl acetate

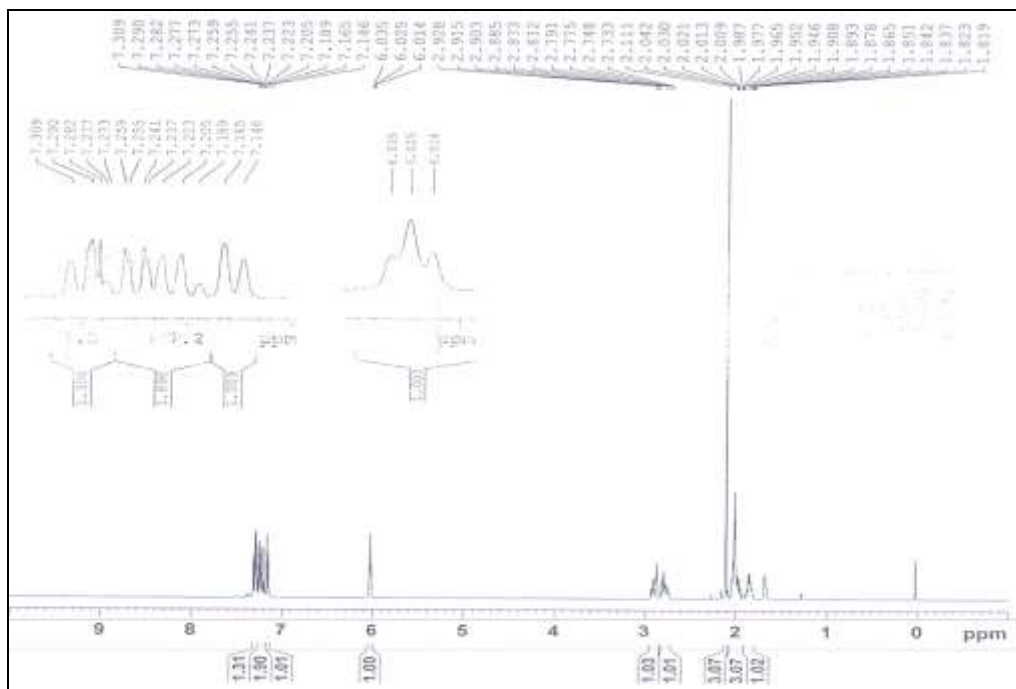

### HPLC of Racemic 1,2,3,4-tetrahydronaphthalen-1-ol

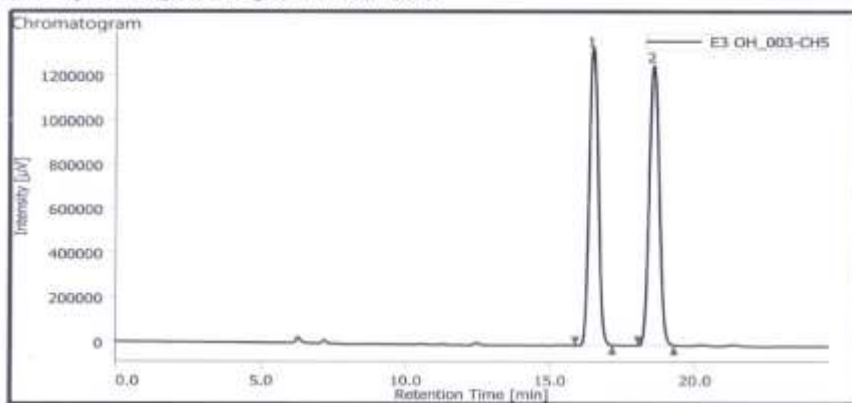

#### Peak Information

| # | Peak Name | CH | TR [min] | Area [µV.sec] | Height [µV] | Area%  | Height% | Quantity | NTP   | Resolution | Symmetry Factor | Warning |
|---|-----------|----|----------|---------------|-------------|--------|---------|----------|-------|------------|-----------------|---------|
| 1 | Unknown   | 5  | 16.477   | 29187139      | 1337870     | 49.109 | 51.513  | N/A      | 12594 | 3.369      | 1.126           |         |
| 2 | Unknown   | 5  | 18.560   | 30247365      | 1299270     | 50.892 | 48.487  | N/A      | 13234 | N/A        | 1.116           |         |

HPLC Condition for compound 1,2,3,4-tetrahydronaphthalen-1-ol Determined by HPLC analysis (chiral column OD-H,0.5ml/ml IPA (5.0%) in hexane; 16.47 min for (*R*)-**15** and 18.56 min for (*S*)-**15**)

### HPLC of (*S*) 1,2,3,4-tetrahydronaphthalen-1-ol

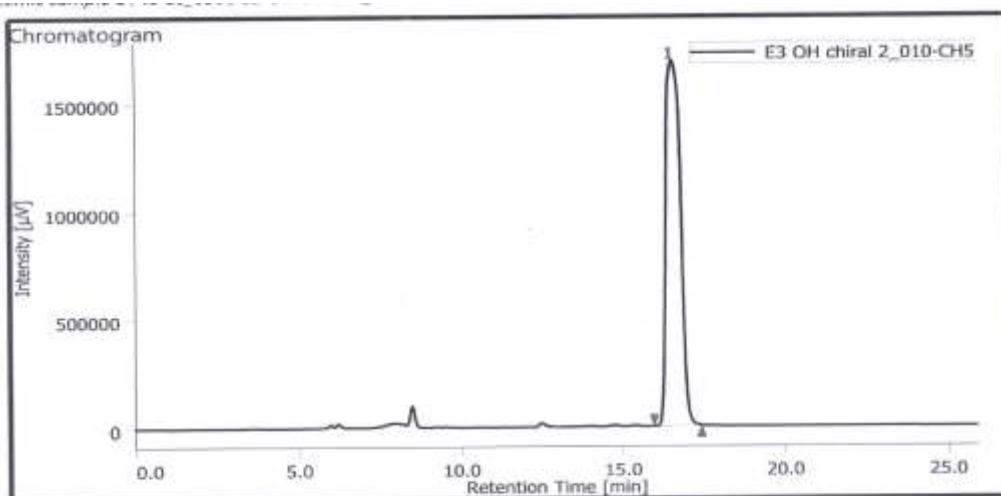

#### Peak Information

| # | Peak Name | CH | TR [min] | Area [µV.sec] | Height [µV] | Area%   | Height% | Quantity | NTP  | Resolution | Symmetry factor | Warning |
|---|-----------|----|----------|---------------|-------------|---------|---------|----------|------|------------|-----------------|---------|
| 1 | Unknown   | 5  | 16.530   | 52695577      | 1684081     | 100.000 | 100.000 | N/A      | 5789 | N/A        | 1.248           |         |

## HPLC of Racemic 1,2,3,4-tetrahydronaphthalen-1-yl acetate

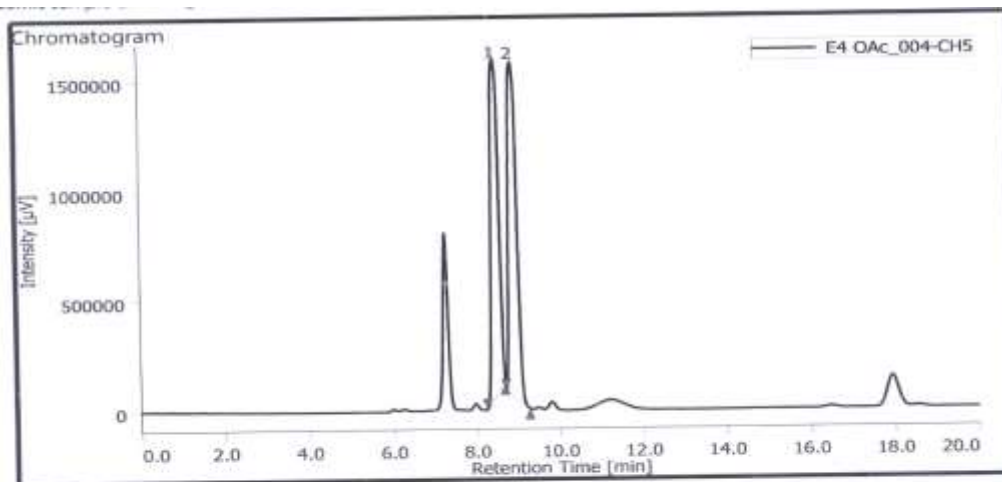

### Peak Information

| # | Peak Name | CH | tr [min] | Area [µV-sec] | Height [µV] | Area%  | Height% | Quantity | NTP  | Resolution | Symmetry Factor | Warning |
|---|-----------|----|----------|---------------|-------------|--------|---------|----------|------|------------|-----------------|---------|
| 1 | Unknown   | 5  | 8.470    | 19994974      | 1528313     | 48.835 | 50.205  | N/A      | 8652 | 1.139      | 1.050           |         |
| 2 | Unknown   | 5  | 8.893    | 20948855      | 1515857     | 51.165 | 49.795  | N/A      | 8712 | N/A        | 1.157           |         |

HPLC Condition for compound 1,2,3,4-tetrahydronaphthalen-1-yl acetate<sup>b</sup> Determined by HPLC analysis (chiral column Amylose 0.5ml/min, IPA (5.0%) in hexane; 8.47 min for (*R*)-**16** and 8.89 min for (*S*)-**16**)

## HPLC of (*R*) 1,2,3,4-tetrahydronaphthalen-1-yl acetate

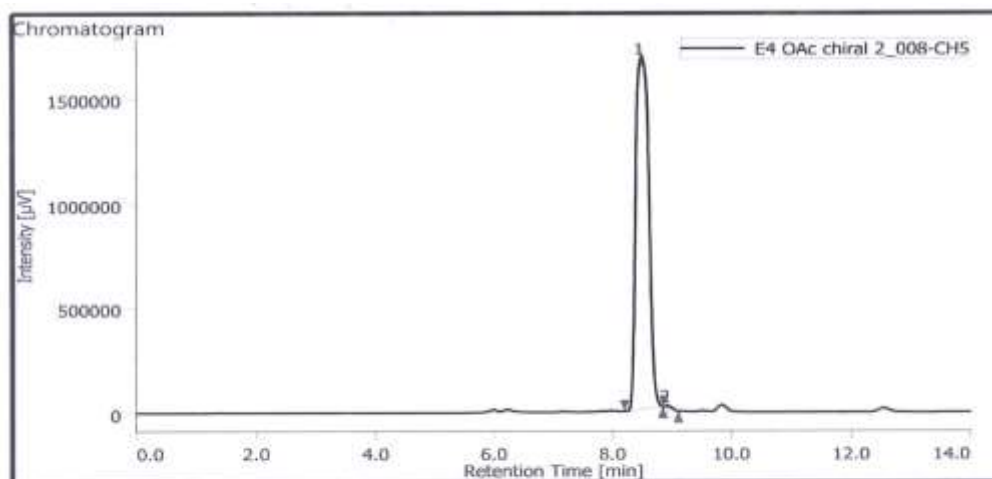

### Peak Information

| # | Peak Name | CH | tr [min] | Area [µV-sec] | Height [µV] | Area%  | Height% | Quantity | NTP   | Resolution | Symmetry Factor | Warning |
|---|-----------|----|----------|---------------|-------------|--------|---------|----------|-------|------------|-----------------|---------|
| 1 | Unknown   | 5  | 8.490    | 25641833      | 1681781     | 99.719 | 99.418  | N/A      | 6460  | 1.381      | 1.182           |         |
| 2 | Unknown   | 5  | 8.920    | 72356         | 9846        | 0.281  | 0.582   | N/A      | 31190 | N/A        | 1.510           |         |

HPLC (R) 1,2,3,4-tetrahydronaphthalen-1-ol after mitsunobu

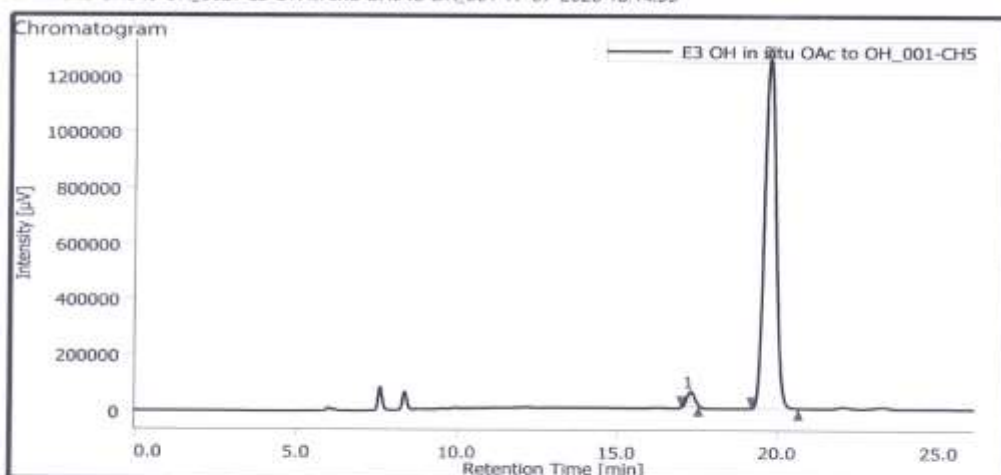

Peak Information

| # | Peak Name | CH | TR [min] | Area [µV·sec] | Height [µV] | Area%  | Height% | Quantity | NTP   | Resolution | Symmetry Factor | Warning |
|---|-----------|----|----------|---------------|-------------|--------|---------|----------|-------|------------|-----------------|---------|
| 1 | Unknown   | 5  | 17.800   | 838201        | 50933       | 2.624  | 3.916   | N/A      | 22667 | 4.302      | 0.935           |         |
| 2 | Unknown   | 5  | 19.720   | 31102045      | 1249648     | 97.376 | 96.084  | N/A      | 13927 | N/A        | 1.115           |         |

<sup>1</sup>H NMR of 1-(3,5-bis(trifluoromethyl)phenyl)ethan-1-ol

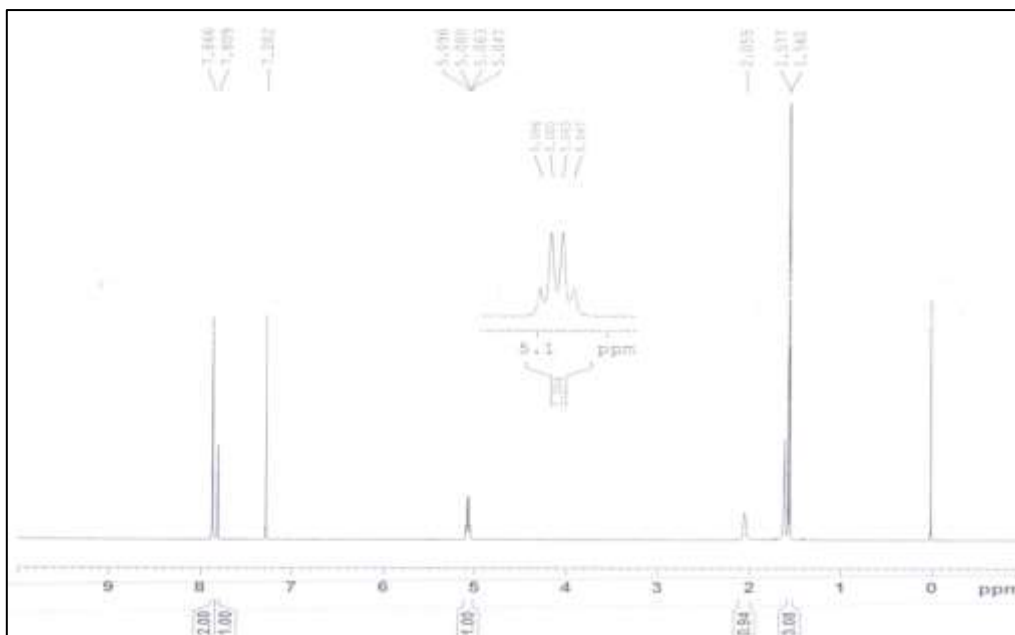

<sup>1</sup>H NMR of 1-(3,5-bis(trifluoromethyl)phenyl)ethyl acetate

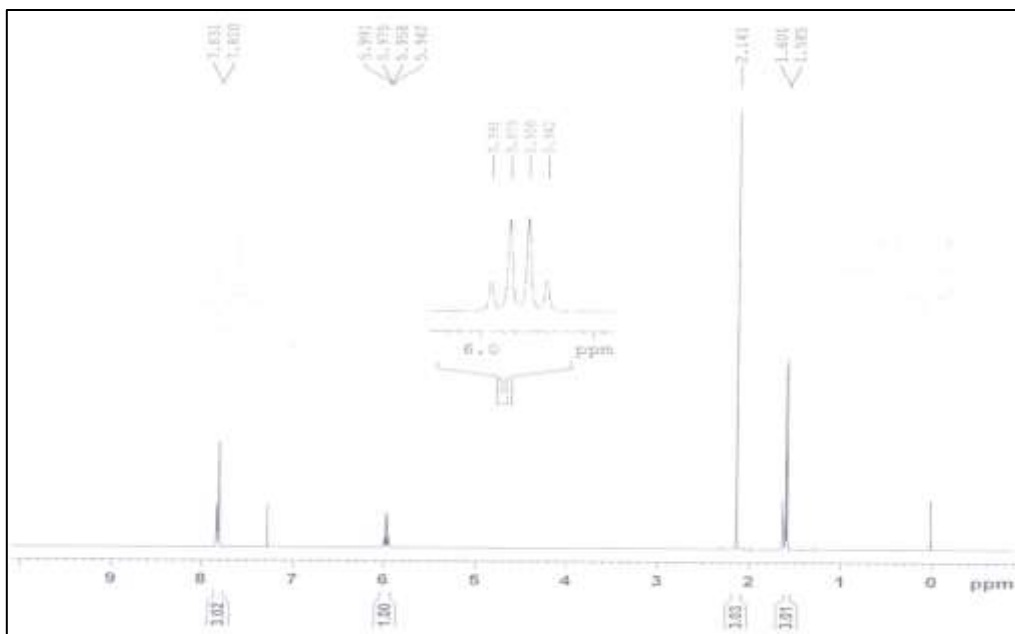

### HPLC of Racemic 1-(3,5-bis(trifluoromethyl)phenyl)ethan-1-ol

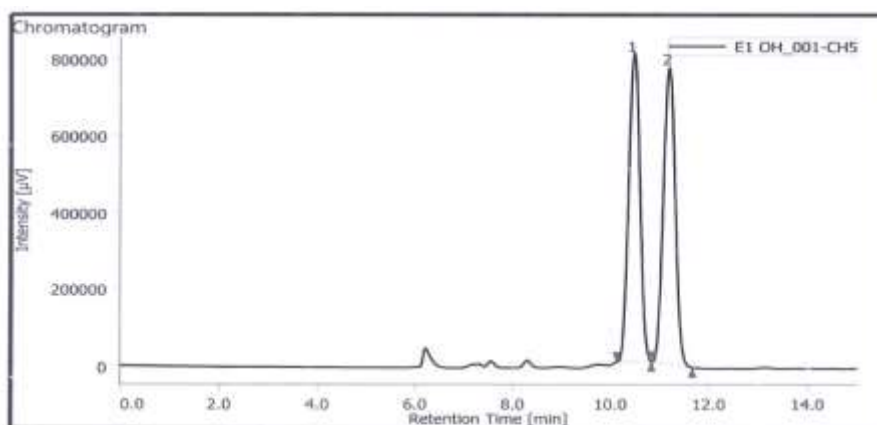

| # | Peak Name | CH | TR [min] | Area [µV·sec] | Height [µV] | Area%  | Height% | Quantity | NTP  | Resolution | Symmetry Factor | Warning |
|---|-----------|----|----------|---------------|-------------|--------|---------|----------|------|------------|-----------------|---------|
| 1 | Unknown   | S  | 10.467   | 12880591      | 802697      | 50.003 | 51.064  | N/A      | 9242 | 1.603      | 1.061           |         |
| 2 | Unknown   | S  | 11.177   | 12878815      | 769248      | 48.997 | 48.936  | N/A      | 9746 | N/A        | 1.080           |         |

HPLC Condition for compound 1-(3,5-bis(trifluoromethyl)phenyl)ethan-1-ol<sup>b</sup> Determined by HPLC analysis (chiral column OD-H 0.5ml/min, IPA (5.0%) in hexane; 10.46 min for (*R*)-**13** and 11.17 min for (*S*)-**13**)

### HPLC of (*S*) 1-(3,5-bis(trifluoromethyl)phenyl)ethan-1-ol

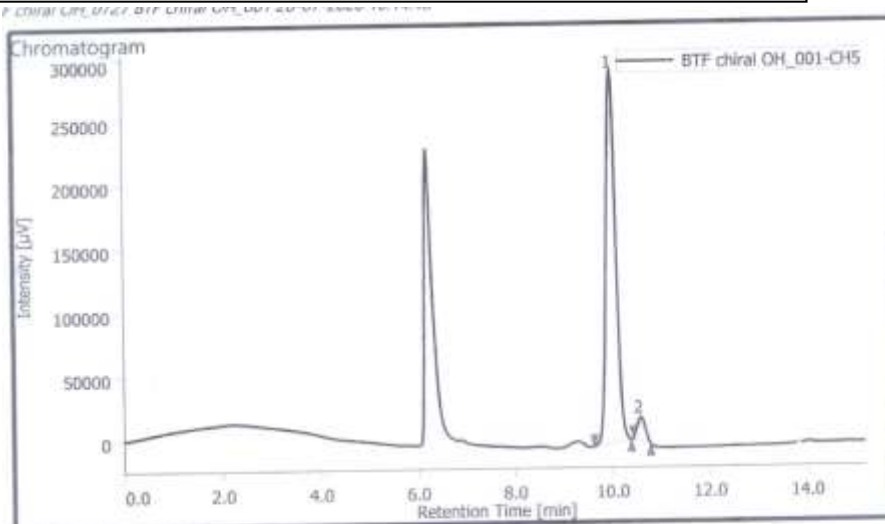

| # | Peak Name | CH | TR [min] | Area [µV·sec] | Height [µV] | Area%  | Height% | Quantity | NTP   | Resolution | Symmetry Factor | Warning |
|---|-----------|----|----------|---------------|-------------|--------|---------|----------|-------|------------|-----------------|---------|
| 1 | Unknown   | S  | 9.997    | 4046572       | 290729      | 95.103 | 94.138  | N/A      | 11883 | 1.688      | 1.051           |         |
| 2 | Unknown   | S  | 10.577   | 208377        | 18224       | 4.897  | 5.861   | N/A      | 17244 | N/A        | 1.120           |         |

HPLC of (R) 1-(3,5-bis(trifluoromethyl)phenyl)ethan-1-ol.

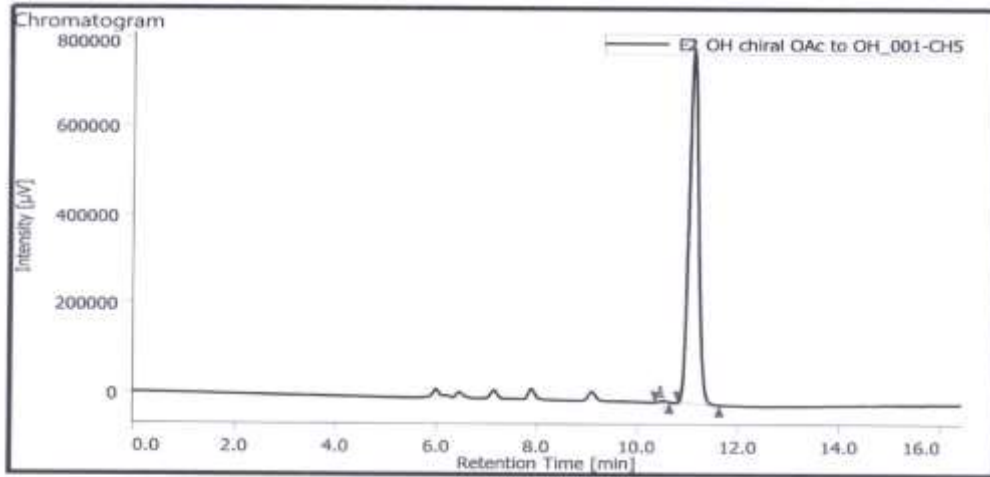

Peak Information

| # | Peak Name | CH | TR [min] | Area [µV-sec] | Height [µV] | Area%  | Height% | Quantity | NTP   | Resolution | Symmetry Factor | Warning |
|---|-----------|----|----------|---------------|-------------|--------|---------|----------|-------|------------|-----------------|---------|
| 1 | Unknown   | S  | 10.517   | 29271         | 3232        | 0.281  | 0.408   | N/A      | 26714 | 1.889      | 0.882           |         |
| 2 | Unknown   | S  | 11.087   | 10386013      | 789864      | 99.719 | 99.592  | N/A      | 16270 | N/A        | 1.103           |         |

HPLC of (R) 1-(3,5-bis(trifluoromethyl)phenyl)ethan-1-ol after mitsunobu

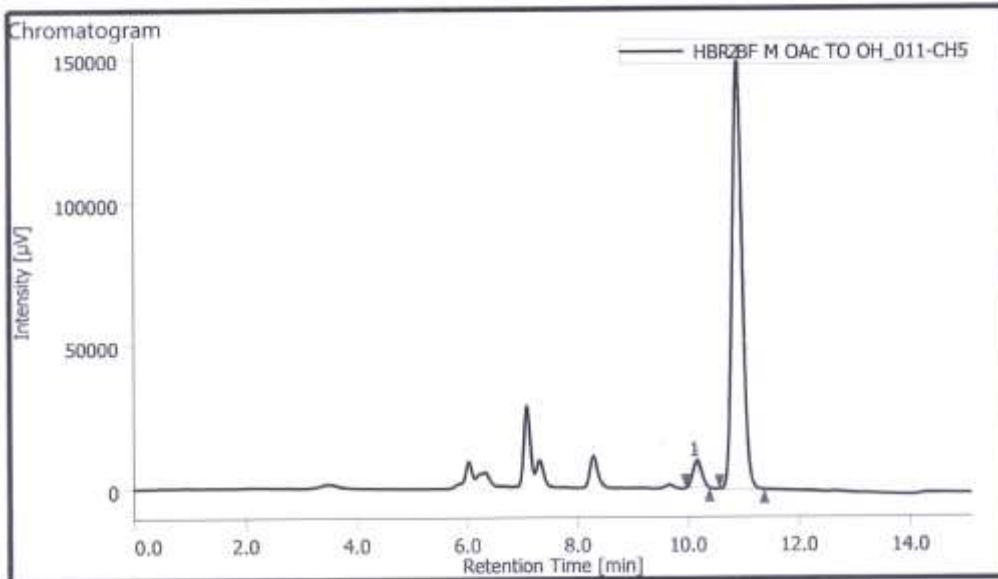

Peak Information

| # | Peak Name | CH | TR [min] | Area [µV-sec] | Height [µV] | Area%  | Height% | Quantity | NTP   | Resolution | Symmetry Factor | Warning |
|---|-----------|----|----------|---------------|-------------|--------|---------|----------|-------|------------|-----------------|---------|
| 1 | Unknown   | S  | 10.157   | 107929        | 9536        | 5.460  | 6.017   | N/A      | 17708 | 2.316      | 1.047           |         |
| 2 | Unknown   | S  | 10.890   | 1868941       | 148943      | 94.540 | 93.983  | N/A      | 17462 | N/A        | 1.088           |         |



<sup>1</sup>H NMR 1-(1-azidoethyl)-3-nitrobenzene

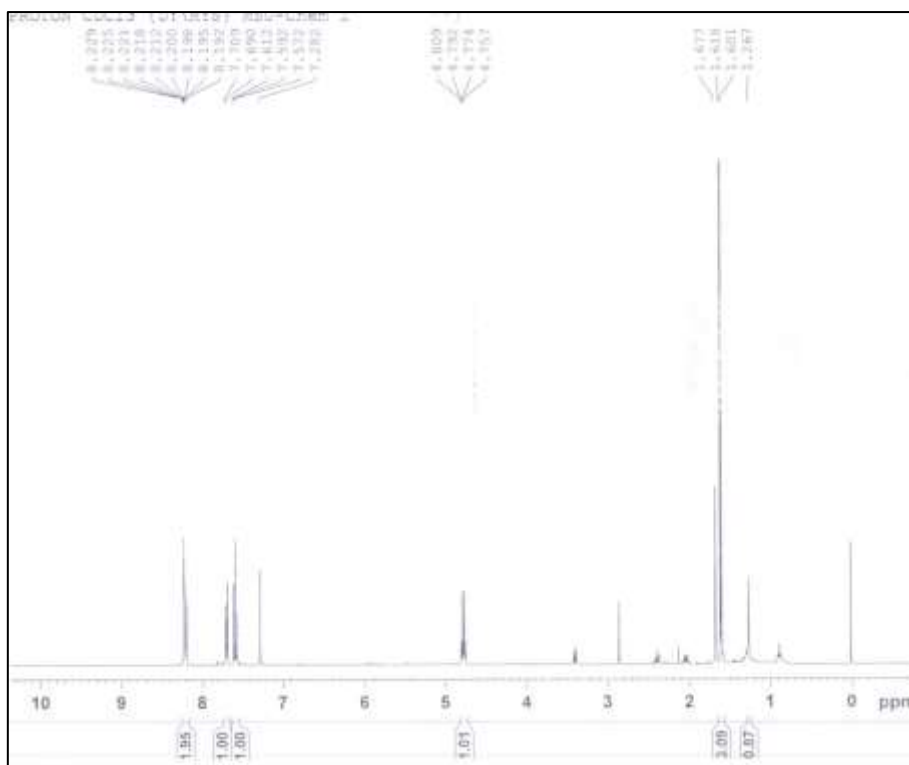

IR 1-(1-azidoethyl)-3-nitrobenzene

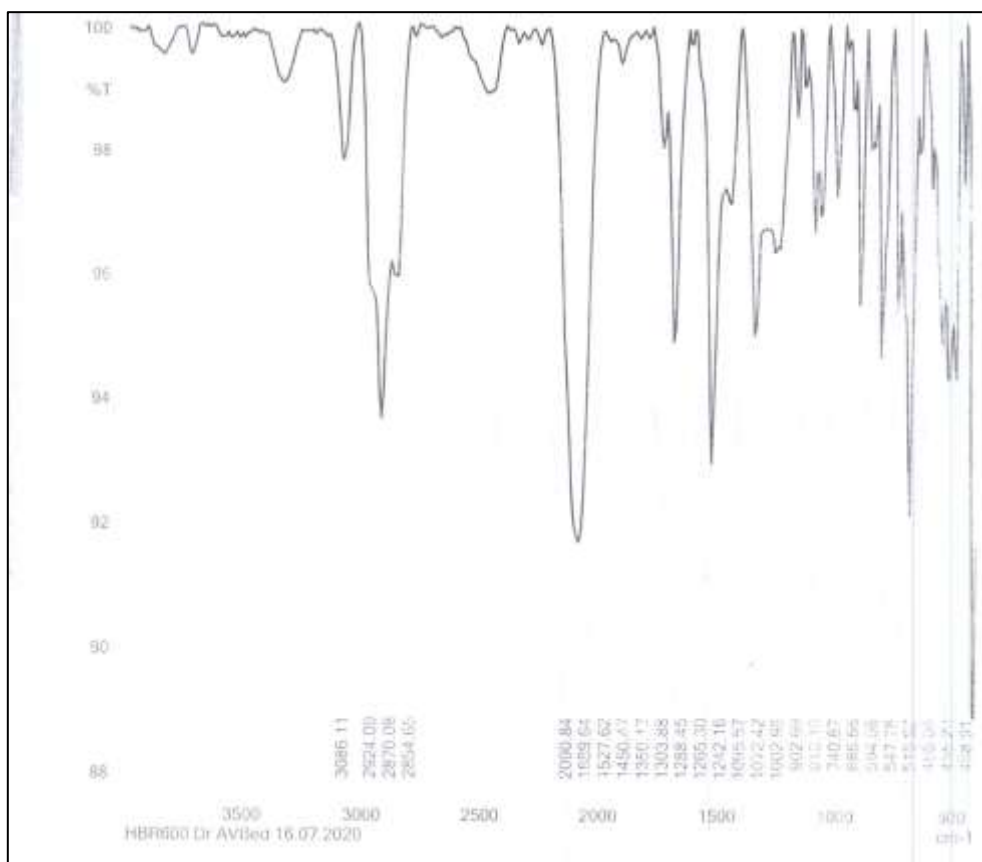

HPLC racemic 1-(1-azidoethyl)-3-nitrobenzene

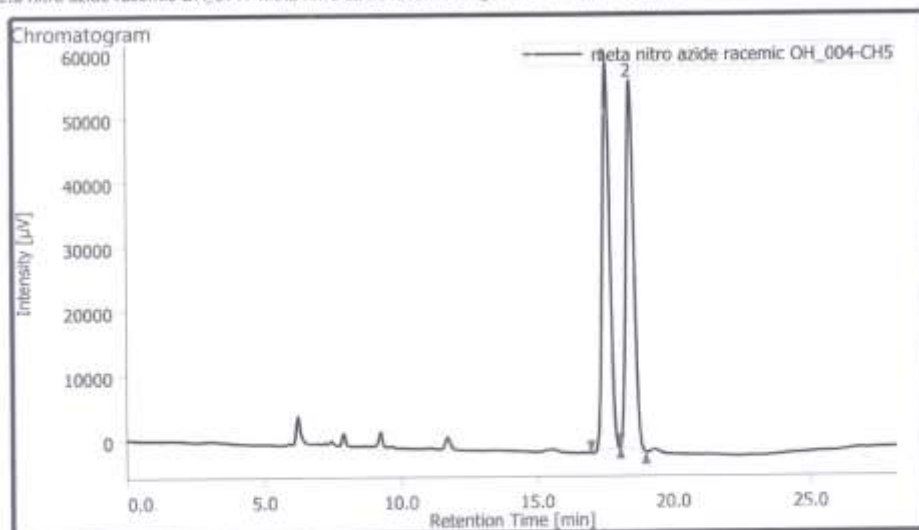

Peak Information

| # | Peak Name | CH | tR [min] | Area [µV-sec] | Height [µV] | Area%  | Height% | Quantity | NTP   | Resolution | Symmetry Factor | Warning |
|---|-----------|----|----------|---------------|-------------|--------|---------|----------|-------|------------|-----------------|---------|
| 1 | Unknown   | 5  | 17.550   | 1145231       | 60020       | 50.091 | 51.258  | N/A      | 19049 | 1.682      | 1.062           |         |
| 2 | Unknown   | 5  | 18.423   | 1141063       | 57072       | 49.909 | 48.742  | N/A      | 19134 | N/A        | 1.093           |         |

HPLC Condition for compound 1-(1-azidoethyl)-3-nitrobenzene<sup>b</sup>Determined by HPLC analysis (chiral column OD-H 0.5ml/min, IPA (5.0%) in hexane; 10.46 min for (R)-**17** and 11.17 min for (S)-**17**)

HPLC chiral (R) 1-(1-azidoethyl)-3-nitrobenzene (NaN<sub>3</sub>/AgNO<sub>3</sub>:2.0/0.0)

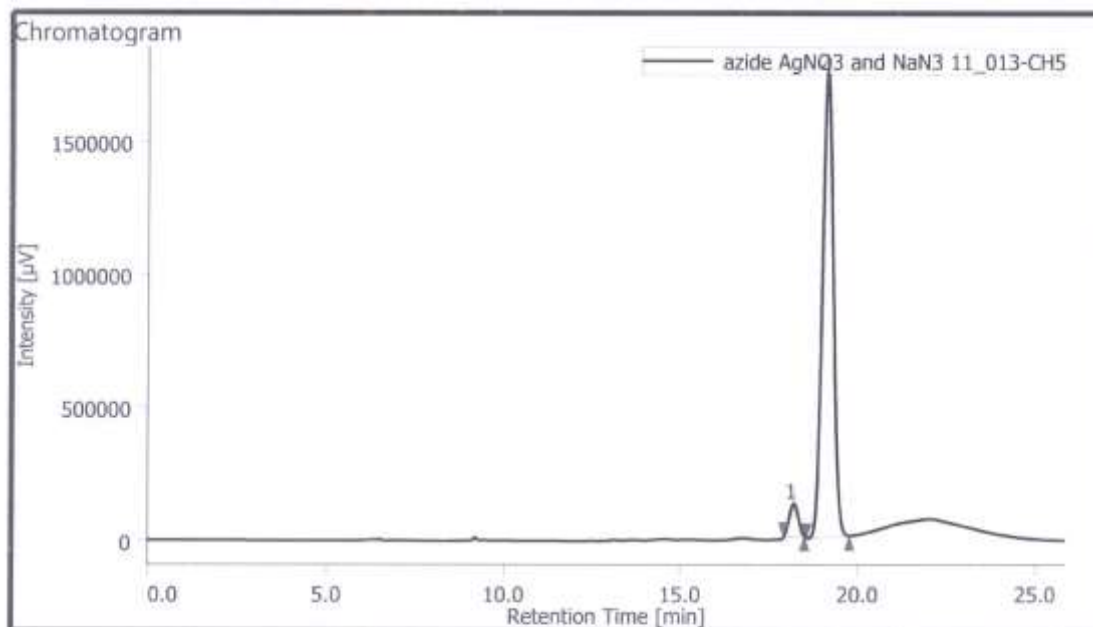

Peak Information

| # | Peak Name | CH | tR [min] | Area [µV-sec] | Height [µV] | Area%  | Height% | Quantity | NTP   | Resolution | Symmetry Factor | Warning |
|---|-----------|----|----------|---------------|-------------|--------|---------|----------|-------|------------|-----------------|---------|
| 1 | Unknown   | 5  | 18.197   | 2202454       | 124710      | 5.571  | 6.662   | N/A      | 22085 | 1.781      | 1.021           |         |
| 2 | Unknown   | 5  | 19.137   | 37332581      | 1747195     | 94.429 | 93.338  | N/A      | 18106 | N/A        | 1.053           |         |

HPLC chiral (*R*)-1-(1-azidoethyl)-3-nitrobenzene (NaN<sub>3</sub>/AgNO<sub>3</sub>:1.75/0.25)

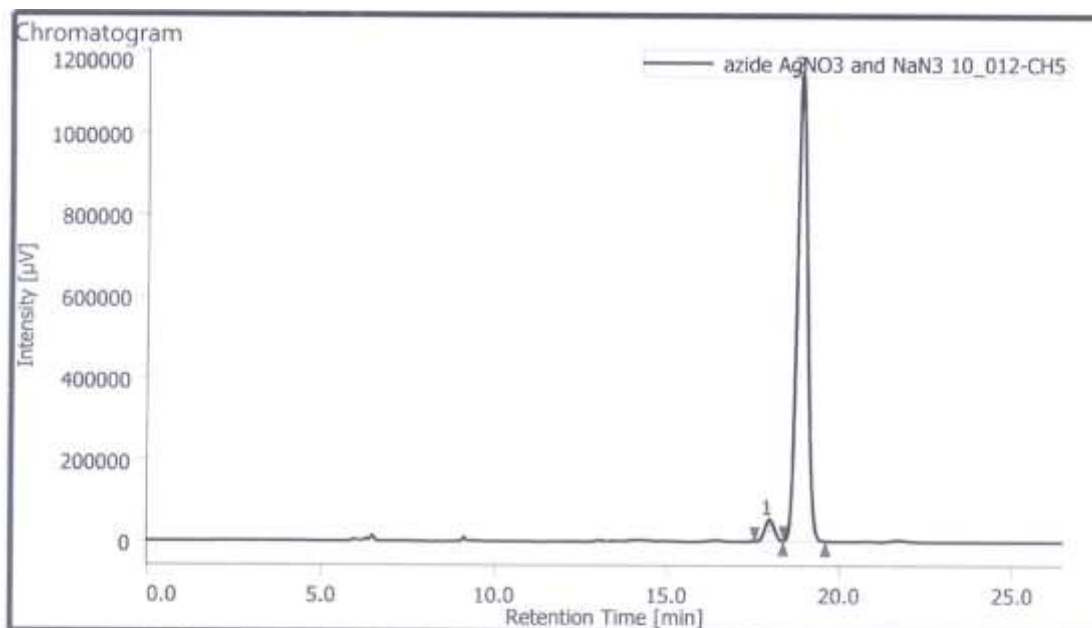

Peak Information

| # | Peak Name | CH | tR [min] | Area [µV-sec] | Height [µV] | Area%  | Height% | Quantity | NTP   | Resolution | Symmetry Factor | Warning |
|---|-----------|----|----------|---------------|-------------|--------|---------|----------|-------|------------|-----------------|---------|
| 1 | Unknown   | 5  | 17.967   | 1005149       | 53164       | 4.045  | 4.437   | N/A      | 19973 | 1.734      | 1.003           |         |
| 2 | Unknown   | 5  | 18.883   | 23846105      | 1145036     | 95.955 | 95.563  | N/A      | 18761 | N/A        | 1.047           |         |

HPLC chiral (*R*)-1-(1-azidoethyl)-3-nitrobenzene (NaN<sub>3</sub>/AgNO<sub>3</sub>:1.50/0.50)

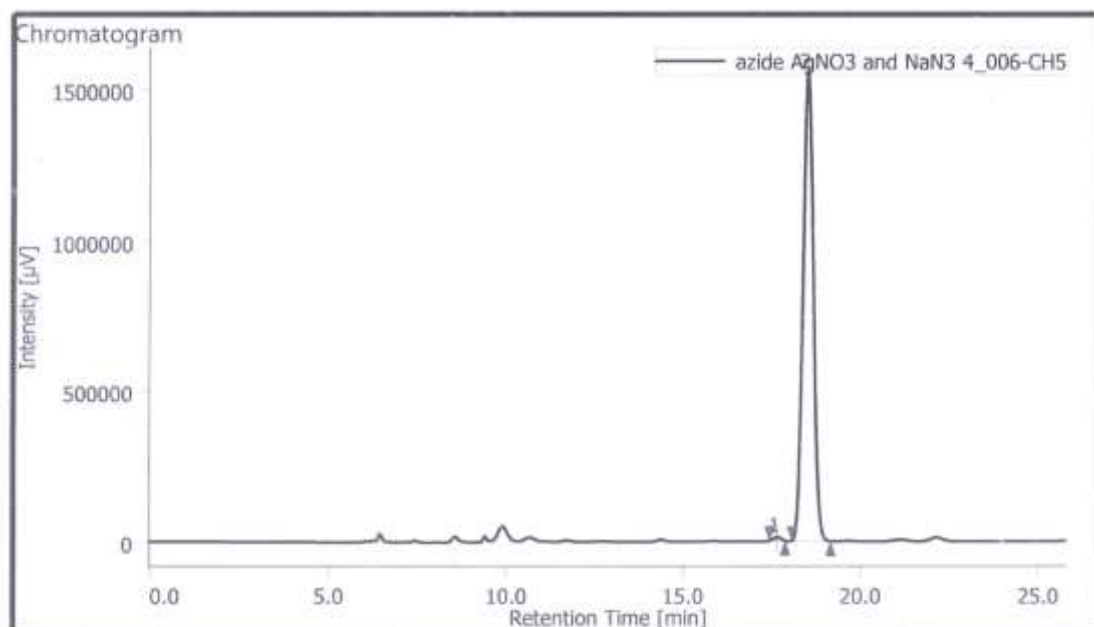

Peak Information

| # | Peak Name | CH | tR [min] | Area [µV-sec] | Height [µV] | Area%  | Height% | Quantity | NTP   | Resolution | Symmetry Factor | Warning |
|---|-----------|----|----------|---------------|-------------|--------|---------|----------|-------|------------|-----------------|---------|
| 1 | Unknown   | 5  | 17.650   | 172864        | 11727       | 0.548  | 0.748   | N/A      | 28082 | 1.815      | 1.009           |         |
| 2 | Unknown   | 5  | 18.517   | 31393449      | 1556648     | 99.452 | 99.252  | N/A      | 19094 | N/A        | 1.049           |         |

HPLC chiral (*R*) 1-(1-azidoethyl)-3-nitrobenzene (NaN<sub>3</sub>/AgNO<sub>3</sub>:1.25/0.75)

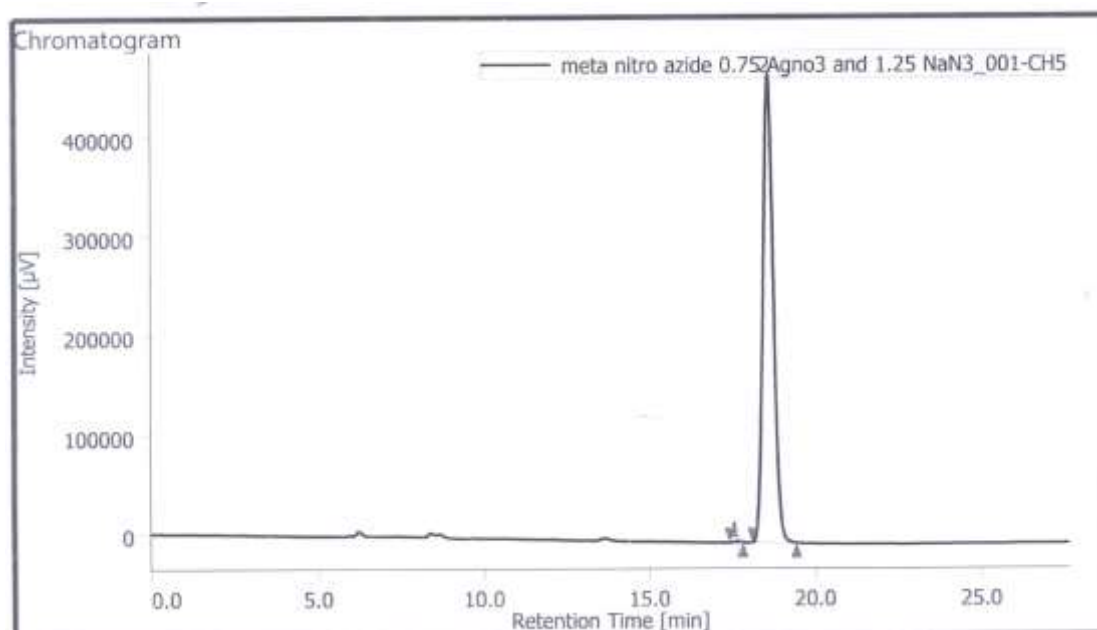

Peak Information

| # | Peak Name | CH | tR [min] | Area [µV-sec] | Height [µV] | Area%  | Height% | Quantity | NTP   | Resolution | Symmetry Factor | Warning |
|---|-----------|----|----------|---------------|-------------|--------|---------|----------|-------|------------|-----------------|---------|
| 1 | Unknown   | 5  | 17.653   | 8198          | 635         | 0.081  | 0.135   | N/A      | 36661 | 1.997      | 0.847           |         |
| 2 | Unknown   | 5  | 18.587   | 10160469      | 470563      | 99.919 | 99.865  | N/A      | 17120 | N/A        | 1.099           |         |

HPLC chiral (*R*) 1-(1-azidoethyl)-3-nitrobenzene (NaN<sub>3</sub>/AgNO<sub>3</sub>:2.0/0.75)

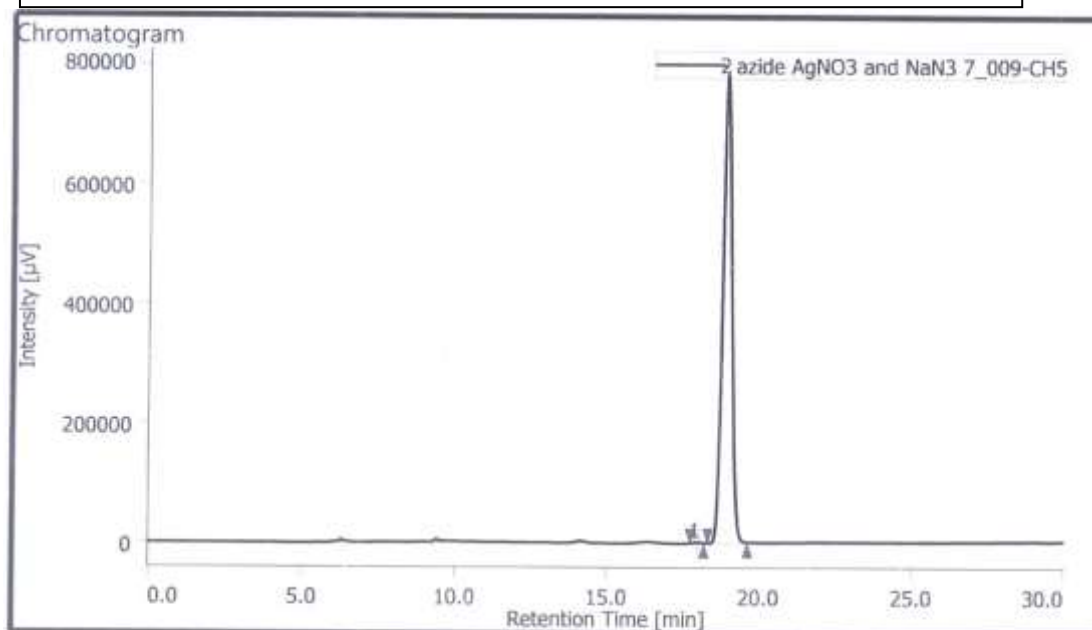

Peak Information

| # | Peak Name | CH | tR [min] | Area [µV-sec] | Height [µV] | Area%  | Height% | Quantity | NTP   | Resolution | Symmetry Factor | Warning |
|---|-----------|----|----------|---------------|-------------|--------|---------|----------|-------|------------|-----------------|---------|
| 1 | Unknown   | 5  | 17.997   | 23141         | 1502        | 0.142  | 0.191   | N/A      | 26840 | 1.870      | 0.927           |         |
| 2 | Unknown   | 5  | 18.920   | 16303509      | 783218      | 99.858 | 99.809  | N/A      | 18866 | N/A        | 1.059           |         |

HPLC (*R*) 1-(3-nitrophenyl)ethan-1-ol (NaN3/AgNO3:2.0/0.0)

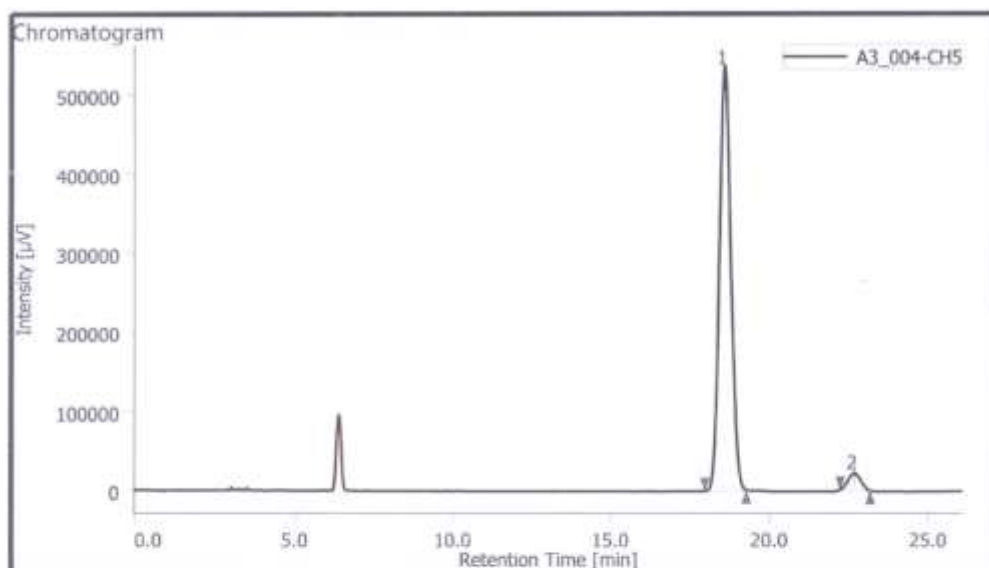

Peak Information

| # | Peak Name | CH | tR [min] | Area [µV-sec] | Height [µV] | Area%  | Height% | Quantity | NTP   | Resolution | Symmetry Factor | Warning |
|---|-----------|----|----------|---------------|-------------|--------|---------|----------|-------|------------|-----------------|---------|
| 1 | Unknown   | S  | 18.587   | 13456708      | 535620      | 95.746 | 96.144  | N/A      | 12497 | 5.694      | 1.139           |         |
| 2 | Unknown   | S  | 22.660   | 597605        | 21483       | 4.252  | 3.856   | N/A      | 13874 | N/A        | 1.034           |         |

HPLC Condition for compound 1-(3-nitrophenyl)ethan-1-ol<sup>b</sup> Determined by HPLC analysis (chiral column Amylose, 1ml/min IPA (5.0%) in hexane; 18.42 min for (*R*)-**1** and 22.37 min for (*S*)-**1**)

HPLC (*R*) 1-(3-nitrophenyl)ethan-1-ol (NaN3/AgNO3:1.75/0.25)

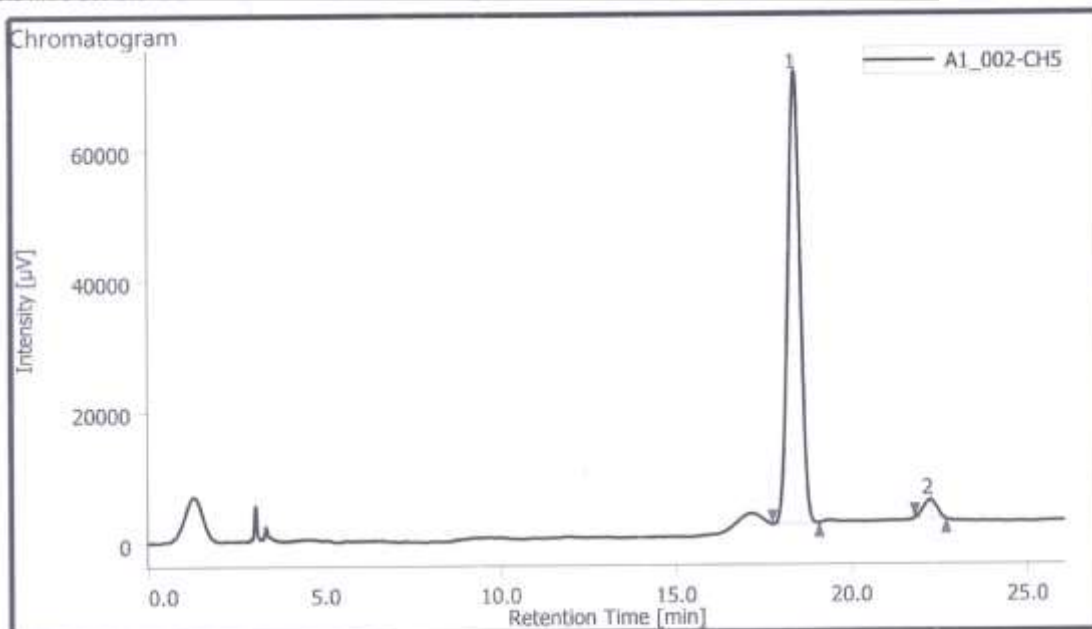

Peak Information

| # | Peak Name | CH | tR [min] | Area [µV-sec] | Height [µV] | Area%  | Height% | Quantity | NTP   | Resolution | Symmetry Factor | Warning |
|---|-----------|----|----------|---------------|-------------|--------|---------|----------|-------|------------|-----------------|---------|
| 1 | Unknown   | S  | 18.380   | 1678417       | 68890       | 95.597 | 95.989  | N/A      | 12808 | 5.514      | 0.981           |         |
| 2 | Unknown   | S  | 22.230   | 77298         | 2876        | 4.403  | 4.011   | N/A      | 14031 | N/A        | 0.968           |         |

HPLC (R) 1-(3-nitrophenyl)ethan-1-ol (NaN<sub>3</sub>/AgNO<sub>3</sub>:1.50/0.50)

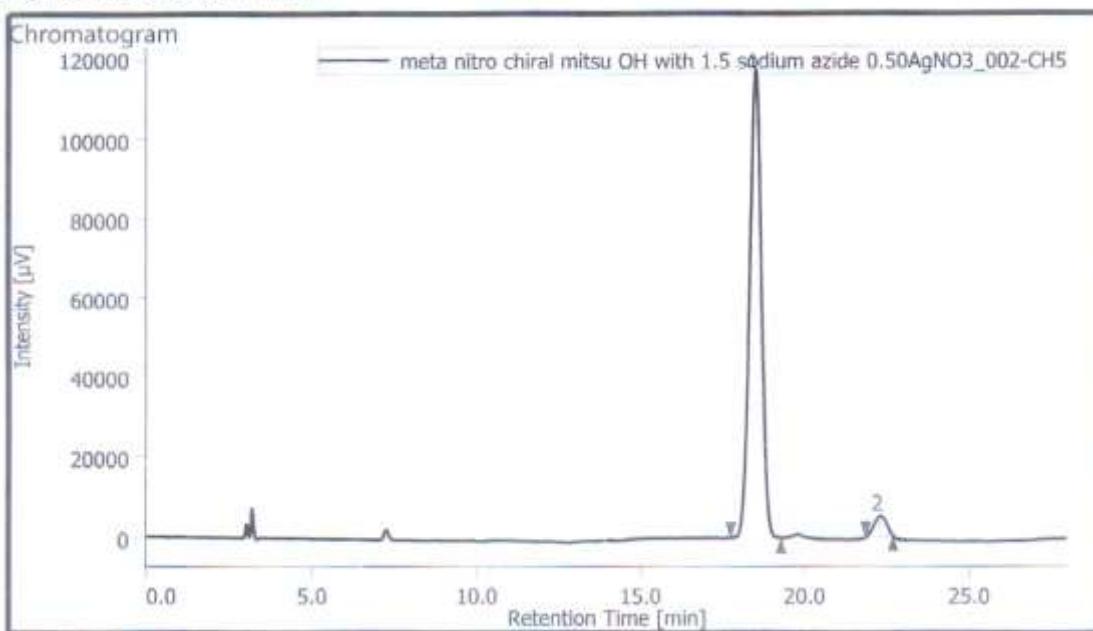

Peak Information

| # | Peak Name | CH | tR [min] | Area [µV-sec] | Height [µV] | Area%  | Height% | Quantity | NTP   | Resolution | Symmetry Factor | Warning |
|---|-----------|----|----------|---------------|-------------|--------|---------|----------|-------|------------|-----------------|---------|
| 1 | Unknown   | 5  | 18.483   | 2914862       | 117425      | 95.736 | 95.959  | N/A      | 12639 | 5.462      | 1.016           |         |
| 2 | Unknown   | 5  | 22.280   | 129821        | 4945        | 4.264  | 4.041   | N/A      | 14649 | N/A        | 0.952           |         |

HPLC (R) 1-(3-nitrophenyl)ethan-1-ol (NaN<sub>3</sub>/AgNO<sub>3</sub>:1.25/0.75)

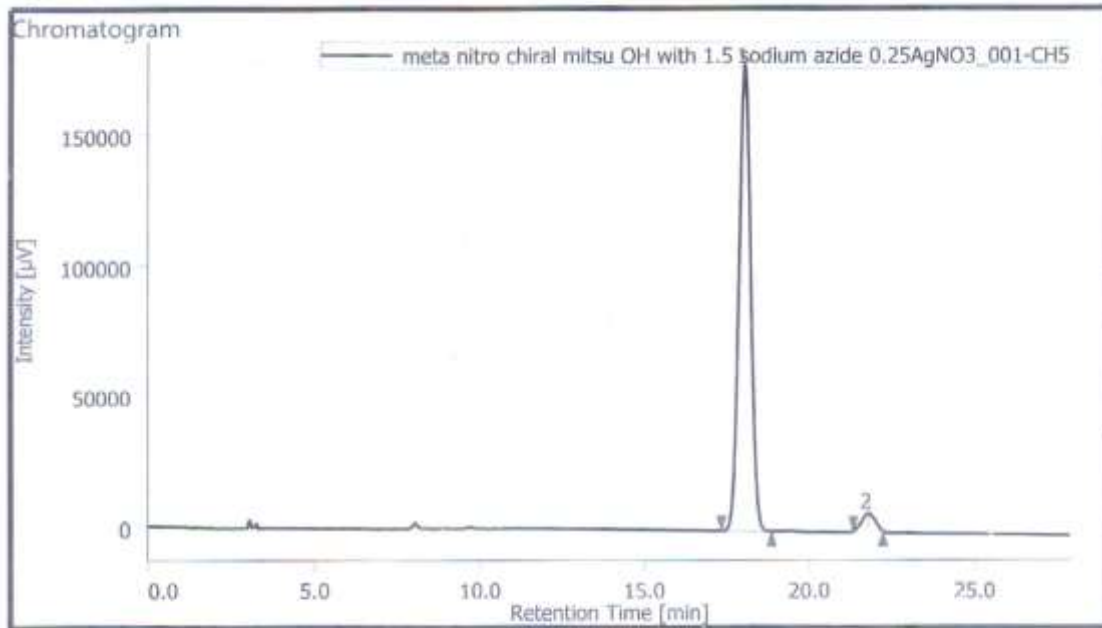

Peak Information

| # | Peak Name | CH | tR [min] | Area [µV-sec] | Height [µV] | Area%  | Height% | Quantity | NTP   | Resolution | Symmetry Factor | Warning |
|---|-----------|----|----------|---------------|-------------|--------|---------|----------|-------|------------|-----------------|---------|
| 1 | Unknown   | 5  | 18.037   | 4406564       | 178458      | 96.081 | 96.465  | N/A      | 12134 | 5.307      | 1.034           |         |
| 2 | Unknown   | 5  | 21.793   | 179759        | 6539        | 3.919  | 3.535   | N/A      | 12996 | N/A        | 0.940           |         |

HPLC (R) 1-(3-nitrophenyl)ethan-1-ol (NaN<sub>3</sub>/AgNO<sub>3</sub>:2.0/0.75)

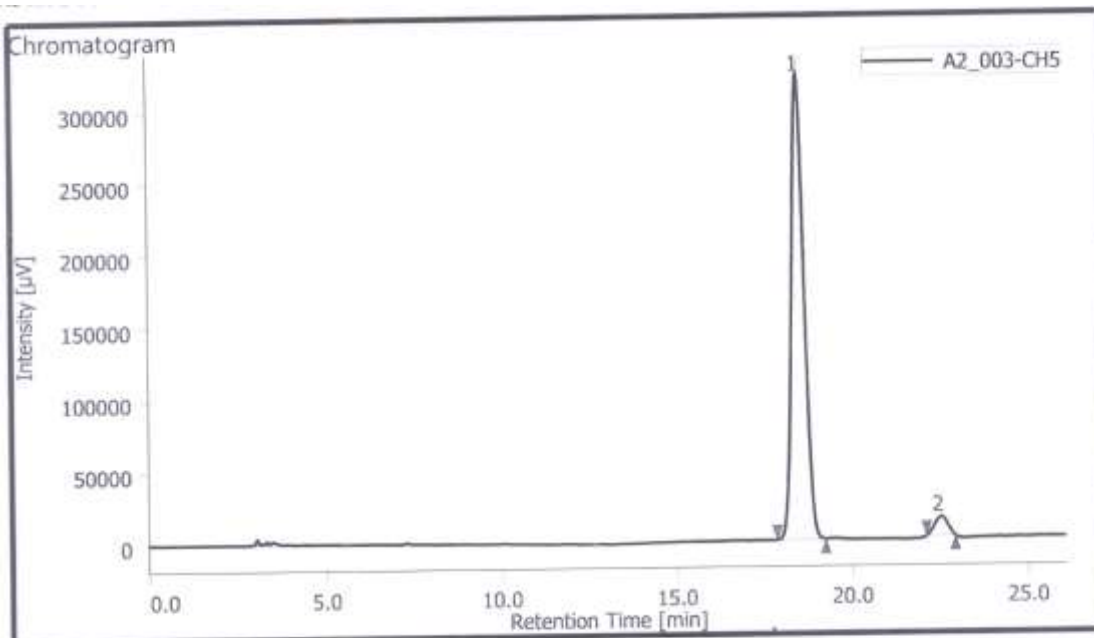

Peak Information

| # | Peak Name | CH | tR [min] | Area [µV-sec] | Height [µV] | Area%  | Height% | Quantity | NTP   | Resolution | Symmetry Factor | Warning |
|---|-----------|----|----------|---------------|-------------|--------|---------|----------|-------|------------|-----------------|---------|
| 1 | Unknown   | 5  | 18.493   | 7953367       | 322782      | 95.972 | 96.122  | N/A      | 12869 | 5.871      | 1.061           |         |
| 2 | Unknown   | 5  | 22.503   | 333772        | 13024       | 4.028  | 3.878   | N/A      | 15733 | N/A        | 0.992           |         |
